# Supplementary material for: The Activating Effect of Strong Acid for Pd-Catalyzed Directed C–H Activation by Concerted Metalation-Deprotonation Mechanism
Source: MDPI journal article supplement (doi:10.3390/molecules26134083), 2021-07-04
Supplement: s1 [file s1]

# Supporting Information

## The Activating Effect of Strong Acid for Pd-Catalyzed Directed C-H activation by Concerted Metalation-Deprotonation Mechanism

Heming Jiang,<sup>1,2</sup> Tian-Yu Sun<sup>2,\*</sup>

<sup>†</sup>Lab of Computational Chemistry & Drug Design, Key Laboratory of Chemical Genomics,  
Peking University Shenzhen Graduate School, Shenzhen, 518055 (China)

<sup>§</sup>Shenzhen Bay Laboratory, Shenzhen 518132, China.

E-mail: Tian-Yu\_Sun@pku.edu.cn

### Table of Contents

|                                                                  |        |
|------------------------------------------------------------------|--------|
| Computational details.....                                       | S2     |
| The scan of C-H bond of cationic species.....                    | S2     |
| The relative free energy of different intermediates of sub2..... | S2     |
| The relative free energy barrier of intermolecular model.....    | S3     |
| References.....                                                  | S4     |
| Cartesian coordinates of related structure.....                  | S5-S29 |

## 1. Computational details

All density functional theory (DFT) calculations were conducted with the Gaussian 09 program<sup>1</sup>. Geometries were optimized with M06/(LANL2DZ+f: Pd; 6-31G(d): others), single-point energies were calculated with M06/(SDD: Pd; 6-311++G(d, p): others)<sup>2</sup> with the SMD solvation model and dichloroethane was chosen as the solvent,<sup>3</sup> only singlet state isomers are discussed in this article. Vibrational frequency analysis confirmed that the structure was either a minimum or a transition state. Gibbs free energies at 298.15 K are presented for discussion.

## 2. The scan of C-H bond of cationic species([PdOAc]<sup>+</sup>).

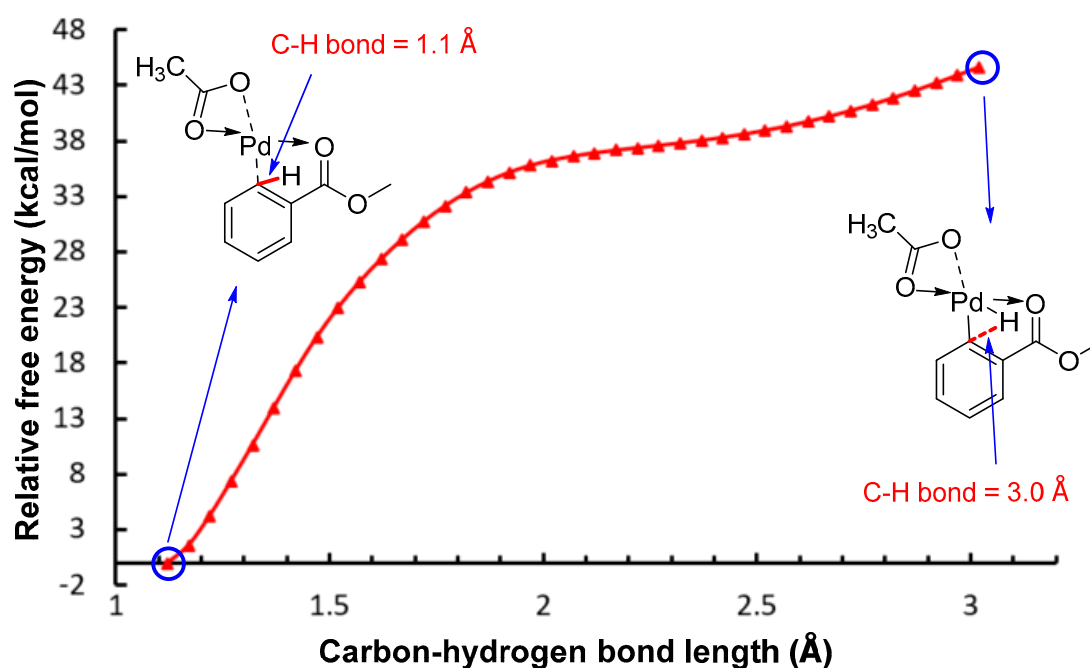

**Figure S1.** The scan of C-H bond of cationic species([PdOAc]<sup>+</sup>).

## 3. The relative free energy of different intermediates of sub2

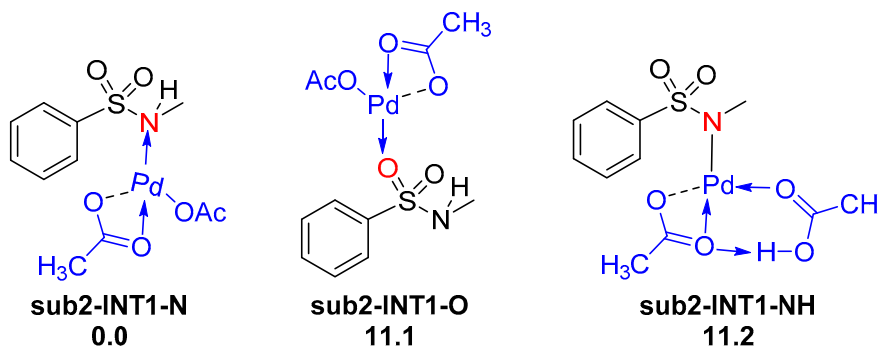

**Figure S2.** the relative free energy of different intermediates of sub2.

**4. the relative free energy barrier of intermolecular model.**

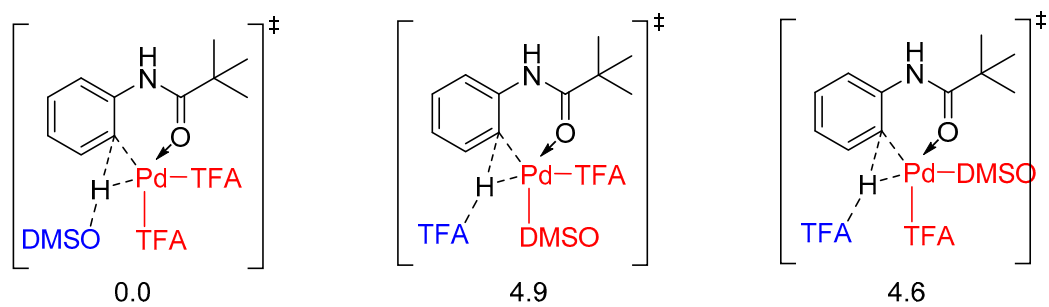

**Figure S3.** the relative free energy barrier of intermolecular model

## REFERENCES

- (1) Gaussian 09, Revision A.02, M. J. Frisch, G. W. Trucks, H. B. Schlegel, G. E. Scuseria, M. A. Robb, J. R. Cheeseman, G. Scalmani, V. Barone, B. Mennucci, G. A. Petersson, H. Nakatsuji, M. Caricato, X. Li, H. P. Hratchian, A. F. Izmaylov, J. Bloino, G. Zheng, J. L. Sonnenberg, M. Hada, M. Ehara, K. Toyota, R. Fukuda, J. Hasegawa, M. Ishida, T. Nakajima, Y. Honda, O. Kitao, H. Nakai, T. Vreven, J. A. Montgomery, Jr., J. E. Peralta, F. Ogliaro, M. Bearpark, J. J. Heyd, E. Brothers, K. N. Kudin, V. N. Staroverov, R. Kobayashi, J. Normand, K. Raghavachari, A. Rendell, J. C. Burant, S. S. Iyengar, J. Tomasi, M. Cossi, N. Rega, J. M. Millam, M. Klene, J. E. Knox, J. B. Cross, V. Bakken, C. Adamo, J. Jaramillo, R. Gomperts, R. E. Stratmann, O. Yazyev, A. J. Austin, R. Cammi, C. Pomelli, J. W. Ochterski, R. L. Martin, K. Morokuma, V. G. Zakrzewski, G. A. Voth, P. Salvador, J. J. Dannenberg, S. Dapprich, A. D. Daniels, O. Farkas, J. B. Foresman, J. V. Ortiz, J. Cioslowski, and D. J. Fox, Gaussian, Inc., Wallingford CT, 2009.
- (2) (a) Hay, P. J.; Wadt, W. R. *J. Chem. Phys.* 1985, 82, 299. (b) Ditchfield, R.; Hehre, W. J.; Pople, J. A. *J. Chem. Phys.* 1971, 54, 724. (c) Hariharan, P. C.; Pople, J. A. *Theor. Chim. Acta.* 1973, 28, 213. (d) Zhao, Y.; Truhlar, D. G. *Theor. Chem. Acc.* 2008, 120, 215.
- (3) Marenich, A. V. Cramer, C. J. and Truhlar, D. G. *J. Phys. Chem. B*, 2009, 113, 6378.

**Cartesian coordinates (in Å) of related structures which calculated at the B3LYP/aug-cc-pVDZ(-pp) level of theory.**

|                      |             |             |             |                      |             |             |             |
|----------------------|-------------|-------------|-------------|----------------------|-------------|-------------|-------------|
| <b>Sub1</b>          |             |             |             | C                    | -0.19219100 | 1.85682000  | 1.02910900  |
| C                    | -2.52783900 | -0.98278200 | 0.34869600  | O                    | 0.52765600  | 1.79139200  | -0.05435400 |
| C                    | -1.18554900 | -1.30773600 | 0.20726200  | C                    | -0.98841900 | 3.14001100  | 1.11489400  |
| C                    | -0.26097700 | -0.33781700 | -0.19099600 | H                    | -0.47501100 | 3.96804800  | 0.61753000  |
| C                    | -0.70662600 | 0.95843600  | -0.46043000 | H                    | -1.95440500 | 2.98739700  | 0.61491000  |
| C                    | -2.04831500 | 1.28211900  | -0.29270000 | H                    | -1.18328900 | 3.38120000  | 2.16411900  |
| C                    | -2.96528100 | 0.31712400  | 0.11022900  | C                    | 5.43498700  | -0.63812500 | -0.57664500 |
| H                    | -3.23519400 | -1.75012200 | 0.65880600  | H                    | 6.00927100  | 0.07032600  | 0.02798300  |
| H                    | -0.83675000 | -2.31922900 | 0.41554100  | H                    | 5.66046700  | -1.66850600 | -0.28625600 |
| H                    | -0.00633100 | 1.70603600  | -0.82635500 | H                    | 5.72601800  | -0.50384500 | -1.62582900 |
| H                    | -2.38082700 | 2.29756800  | -0.50183400 | O                    | -0.28092600 | 0.98548000  | 1.88887700  |
| H                    | -4.01594600 | 0.57391000  | 0.22959600  | H                    | -0.36831800 | -2.86755100 | 2.16194800  |
| N                    | 1.08461500  | -0.71889700 | -0.35795300 | H                    | 1.05879700  | -2.47329500 | 1.15284300  |
| H                    | 1.25579600  | -1.66361400 | -0.68812300 | H                    | 0.43341200  | -1.27505800 | 2.31272300  |
| C                    | 2.26335500  | -0.09255900 | 0.00397900  | <b>Sub1-INT1-TFA</b> |             |             |             |
| O                    | 3.32654300  | -0.64181400 | -0.21502200 | C                    | -5.25288500 | 0.34099200  | -1.18831600 |
| C                    | 2.17711300  | 1.25162900  | 0.67778800  | C                    | -5.41485600 | -0.86704700 | -0.51755700 |
| H                    | 2.17945200  | 2.05356000  | -0.07139700 | C                    | -4.32375400 | -1.48035600 | 0.08275100  |
| H                    | 1.28274900  | 1.36977700  | 1.29887000  | C                    | -3.06335500 | -0.88679600 | 0.01230900  |
| H                    | 3.07711800  | 1.36842200  | 1.28776900  | C                    | -2.89057200 | 0.32346000  | -0.65931400 |
| <b>Sub1-INT1-OAc</b> |             |             |             | C                    | -3.99314500 | 0.92752500  | -1.25180200 |
| C                    | -5.21997400 | 0.39580200  | -1.22603000 | H                    | -6.10690900 | 0.82540900  | -1.65713000 |
| C                    | -5.43754900 | -0.71071300 | -0.41175200 | H                    | -6.39456700 | -1.33694900 | -0.45801500 |
| C                    | -4.36597800 | -1.34137100 | 0.20524900  | H                    | -4.44751600 | -2.42716700 | 0.60993200  |
| C                    | -3.06656100 | -0.86816400 | 0.01547800  | H                    | -1.91414700 | 0.79093700  | -0.72579900 |
| C                    | -2.83848800 | 0.24311700  | -0.79952900 | H                    | -3.85531500 | 1.87919200  | -1.76162300 |
| C                    | -3.92270200 | 0.86275700  | -1.41140400 | N                    | -2.01220500 | -1.53916500 | 0.71291000  |
| H                    | -6.05705900 | 0.89155200  | -1.71344400 | H                    | -2.31123800 | -2.15267800 | 1.46158300  |
| H                    | -6.44573800 | -1.08948400 | -0.25460900 | C                    | -0.68842700 | -1.38346500 | 0.57628200  |
| H                    | -4.53548500 | -2.21148200 | 0.84101500  | O                    | -0.23360100 | -0.71362900 | -0.38049700 |
| H                    | -1.83071000 | 0.61581700  | -0.95506100 | C                    | 0.18856200  | -2.03126000 | 1.59486400  |
| H                    | -3.74123100 | 1.72919300  | -2.04521000 | Pd                   | 1.59888900  | 0.18853800  | -0.25190500 |
| N                    | -2.03793700 | -1.53718700 | 0.72443800  | C                    | 3.93920100  | -0.38017700 | -0.46625200 |
| H                    | -2.34949300 | -2.08303100 | 1.51845700  | O                    | 3.59810400  | 0.81454100  | -0.25379300 |
| C                    | -0.70451800 | -1.43803100 | 0.56531400  | O                    | 3.06988800  | -1.29168200 | -0.56237700 |
| O                    | -0.23220200 | -0.84686400 | -0.42594600 | C                    | -0.17547100 | 1.92152500  | 1.06907600  |
| C                    | 0.14928900  | -2.07216100 | 1.61343300  | O                    | 0.57022500  | 1.87919100  | 0.01843400  |
| Pd                   | 1.59977200  | 0.12073300  | -0.27744300 | C                    | -0.97474900 | 3.24372500  | 1.09409900  |
| C                    | 3.97762900  | -0.37049900 | -0.43722100 | C                    | 5.41220500  | -0.75938600 | -0.61395000 |
| O                    | 3.54835300  | 0.81343100  | -0.24479700 | O                    | -0.32856500 | 1.08913100  | 1.94418100  |
| O                    | 3.11976600  | -1.30547200 | -0.53121400 | H                    | -0.31557000 | -2.83548400 | 2.14185100  |

|   |             |             |             |
|---|-------------|-------------|-------------|
| H | 1.08889900  | -2.42718800 | 1.11161700  |
| H | 0.48856800  | -1.25082600 | 2.30687600  |
| F | 5.61183300  | -1.29558800 | -1.81370000 |
| F | 5.72713900  | -1.66331300 | 0.30993200  |
| F | 6.19635100  | 0.29498000  | -0.47347100 |
| F | -0.16569000 | 4.29647900  | 1.01803100  |
| F | -1.80677400 | 3.28300400  | 0.04512000  |
| F | -1.69770200 | 3.34626500  | 2.19890300  |

### Sub1-INT1-OTf

|    |             |             |             |
|----|-------------|-------------|-------------|
| C  | -5.83270800 | -1.81578100 | -1.10060300 |
| C  | -5.59887900 | -2.90457100 | -0.26703100 |
| C  | -4.46065100 | -2.93545000 | 0.53022500  |
| C  | -3.56892900 | -1.86793300 | 0.49409000  |
| C  | -3.79944900 | -0.76364300 | -0.32356700 |
| C  | -4.93395300 | -0.75253800 | -1.12565800 |
| H  | -6.72013100 | -1.79327100 | -1.73020300 |
| H  | -6.29874200 | -3.73740300 | -0.24057300 |
| H  | -4.25548500 | -3.78985200 | 1.17493200  |
| H  | -3.10793600 | 0.07625600  | -0.31448200 |
| H  | -5.12128100 | 0.10480000  | -1.76902700 |
| N  | -2.43216200 | -1.91039000 | 1.36026400  |
| H  | -2.59875300 | -2.14863800 | 2.33064600  |
| C  | -1.18229700 | -1.58257300 | 1.02509300  |
| O  | -0.91311800 | -1.34897400 | -0.18103200 |
| C  | -0.15169300 | -1.53761700 | 2.10352900  |
| Pd | 0.76551200  | -0.35281200 | -0.71340500 |
| H  | -0.49002800 | -2.01646900 | 3.02849800  |
| H  | 0.76575900  | -2.02715200 | 1.75576300  |
| H  | 0.07937500  | -0.48658200 | 2.32444200  |
| S  | -0.61760200 | 1.92173600  | 0.57606700  |
| O  | 0.63024700  | 2.24984200  | 1.24590100  |
| O  | -1.63913000 | 1.21122700  | 1.34467200  |
| C  | -1.40170100 | 3.49348000  | 0.03499600  |
| F  | -1.69485600 | 4.20165100  | 1.11264400  |
| F  | -2.51296900 | 3.22574700  | -0.63180300 |
| F  | -0.57461700 | 4.17621800  | -0.73179100 |
| O  | -0.40358400 | 1.30211700  | -0.81727900 |
| S  | 3.36029400  | -0.85060300 | -0.95495600 |
| O  | 2.24700500  | -1.85386000 | -0.70058200 |
| O  | 2.62205000  | 0.42545500  | -1.30368100 |
| C  | 4.05138900  | -0.52987000 | 0.72516600  |
| F  | 3.07225800  | -0.21188700 | 1.55417400  |
| F  | 4.91622200  | 0.45775300  | 0.64679400  |
| F  | 4.64904900  | -1.62859000 | 1.14641300  |

|   |            |             |             |
|---|------------|-------------|-------------|
| O | 4.45458300 | -1.25630700 | -1.79359100 |
|---|------------|-------------|-------------|

### Sub1-TS1-OAc

|    |             |             |             |
|----|-------------|-------------|-------------|
| C  | -3.12055100 | 1.08398100  | 1.86225200  |
| C  | -3.92904400 | -0.00816700 | 1.55659800  |
| C  | -3.52465700 | -0.92929600 | 0.59951800  |
| C  | -2.31375700 | -0.75214500 | -0.06715300 |
| C  | -1.50254900 | 0.36860700  | 0.17604700  |
| C  | -1.92884500 | 1.26135400  | 1.17601600  |
| H  | -3.42643500 | 1.79597900  | 2.62595400  |
| H  | -4.87304400 | -0.15606800 | 2.07783800  |
| H  | -4.13433800 | -1.80953300 | 0.39278900  |
| H  | -1.02415000 | 1.10125300  | -0.81249000 |
| H  | -1.30521600 | 2.12911600  | 1.38918000  |
| N  | -1.93039700 | -1.76857200 | -0.98160300 |
| H  | -2.68859200 | -2.26132400 | -1.43852100 |
| C  | -0.71250400 | -2.35792700 | -1.04620100 |
| O  | 0.29162900  | -1.95160600 | -0.44688700 |
| C  | -0.59878500 | -3.58927300 | -1.89248700 |
| Pd | 0.60236800  | 0.08557500  | -0.05019400 |
| C  | 0.29496900  | 2.73131200  | -0.93250800 |
| O  | 0.99455000  | 2.10451700  | -0.07683300 |
| O  | -0.71623800 | 2.25885600  | -1.51996600 |
| C  | 2.96503900  | -0.80504300 | 1.01595800  |
| O  | 2.59026200  | -0.27114100 | -0.11270300 |
| C  | 4.44502500  | -1.11877200 | 1.04820100  |
| H  | 4.71674000  | -1.75883600 | 0.20092900  |
| H  | 5.02320500  | -0.19223800 | 0.95146700  |
| H  | 4.70041200  | -1.61472600 | 1.98895000  |
| C  | 0.73307700  | 4.13008300  | -1.26185300 |
| H  | 1.41821300  | 4.08418500  | -2.11726300 |
| H  | -0.12680600 | 4.74275500  | -1.54614000 |
| H  | 1.27175900  | 4.57404900  | -0.42063300 |
| O  | 2.22309700  | -1.03182600 | 1.96398100  |
| H  | -1.54746800 | -3.91277000 | -2.33301100 |
| H  | 0.12391200  | -3.39869300 | -2.69366400 |
| H  | -0.19006000 | -4.39769800 | -1.27679500 |

### Sub1-TS1-TFA

|   |             |             |             |
|---|-------------|-------------|-------------|
| C | -3.17899800 | 1.14642800  | 1.74683600  |
| C | -3.99422100 | 0.07104400  | 1.40100900  |
| C | -3.55693400 | -0.87334700 | 0.48167000  |
| C | -2.30216700 | -0.73825600 | -0.10798400 |
| C | -1.48231400 | 0.37180600  | 0.16702000  |
| C | -1.94359400 | 1.28613500  | 1.13459100  |
| H | -3.51341200 | 1.87532900  | 2.48151600  |

|                     |             |             |             |                        |             |             |             |
|---------------------|-------------|-------------|-------------|------------------------|-------------|-------------|-------------|
| H                   | -4.97212900 | -0.04628300 | 1.86383500  | Pd                     | -0.32716400 | 0.58957600  | -0.22245300 |
| H                   | -4.17591600 | -1.74034100 | 0.24980100  | H                      | 0.20608100  | 5.22212600  | -2.24485300 |
| H                   | -1.01985400 | 1.12192900  | -0.83619000 | H                      | -0.73455700 | 3.94284700  | -3.06327300 |
| H                   | -1.31717600 | 2.14434100  | 1.37721000  | H                      | -1.46637300 | 4.84037400  | -1.73700600 |
| N                   | -1.88418500 | -1.78057700 | -0.97291500 | S                      | 1.53684600  | -1.72382400 | -0.90674600 |
| H                   | -2.62277100 | -2.28652000 | -1.44820500 | O                      | 2.33243200  | -0.46566700 | -1.18854100 |
| C                   | -0.66535600 | -2.36804500 | -0.97082800 | O                      | 0.37850600  | -1.39150800 | -0.00212100 |
| O                   | 0.31271000  | -1.93548000 | -0.34165200 | C                      | 0.75968300  | -2.08969000 | -2.53641700 |
| C                   | -0.50708500 | -3.62639100 | -1.76407800 | F                      | 0.09108000  | -1.02983200 | -2.95622800 |
| Pd                  | 0.60729700  | 0.08443000  | 0.00113500  | F                      | -0.05620000 | -3.11181000 | -2.39668300 |
| C                   | 0.30220400  | 2.70939900  | -0.90125200 | F                      | 1.71309400  | -2.38346200 | -3.40113200 |
| O                   | 1.00070200  | 2.11948400  | -0.04217900 | O                      | 2.29770000  | -2.88775500 | -0.52385100 |
| O                   | -0.69051200 | 2.25660200  | -1.52151700 | S                      | -3.30859900 | 0.19929600  | 0.06831900  |
| C                   | 2.98445500  | -0.84459900 | 1.03843900  | O                      | -2.91759300 | 1.16666400  | 1.08956600  |
| O                   | 2.60914900  | -0.28116700 | -0.05677500 | O                      | -2.16067100 | -0.08727600 | -0.90488600 |
| C                   | 4.48028200  | -1.21614400 | 0.97950600  | C                      | -3.40561800 | -1.40308200 | 0.95914000  |
| C                   | 0.64866100  | 4.17877100  | -1.19194800 | F                      | -2.25606400 | -1.63693700 | 1.58443600  |
| O                   | 2.32050000  | -1.10074000 | 2.02588700  | F                      | -3.64475000 | -2.39027500 | 0.11192500  |
| H                   | -1.43431700 | -3.97265900 | -2.23138300 | F                      | -4.37895400 | -1.35148500 | 1.85619500  |
| H                   | 0.24912700  | -3.45972700 | -2.53934700 | O                      | -4.57344700 | 0.34229000  | -0.62526800 |
| H                   | -0.11884300 | -4.40775400 | -1.10178600 | <b>Sub2</b>            |             |             |             |
| F                   | 0.70611400  | 4.38084900  | -2.50240100 | C                      | 2.80912700  | 0.95778400  | -0.40780200 |
| F                   | -0.32053200 | 4.94373600  | -0.68662500 | C                      | 1.44276000  | 1.16586800  | -0.24298800 |
| F                   | 1.79848900  | 4.53721100  | -0.65092000 | C                      | 0.63844100  | 0.08529600  | 0.09825200  |
| F                   | 5.23050800  | -0.14295000 | 0.72410900  | C                      | 1.16237400  | -1.19110100 | 0.28834700  |
| F                   | 4.69530700  | -2.10749600 | 0.00506900  | C                      | 2.52627900  | -1.38580400 | 0.11988400  |
| F                   | 4.89519300  | -1.74894500 | 2.12161500  | C                      | 3.34595900  | -0.31279900 | -0.22824000 |
| <b>Sub1-TS1-OTf</b> |             |             |             | H                      | 3.45533900  | 1.79212800  | -0.67339600 |
| C                   | 2.78656300  | 1.35289700  | 2.60935600  | H                      | 0.99437600  | 2.14949000  | -0.36610200 |
| C                   | 3.11859700  | 2.68602100  | 2.37096000  | H                      | 0.50185200  | -2.01101300 | 0.56426900  |
| C                   | 2.60085700  | 3.36013100  | 1.27277400  | H                      | 2.95464600  | -2.37585000 | 0.26318200  |
| C                   | 1.74499000  | 2.69893500  | 0.39525700  | H                      | 4.41535900  | -0.47074400 | -0.35752500 |
| C                   | 1.45350900  | 1.32677200  | 0.55962200  | S                      | -1.10235300 | 0.33913500  | 0.33731000  |
| C                   | 1.96158200  | 0.69144800  | 1.71646300  | O                      | -1.54610900 | -0.36629100 | 1.52968900  |
| H                   | 3.18048500  | 0.83542100  | 3.48071700  | O                      | -1.37505000 | 1.76434000  | 0.17699800  |
| H                   | 3.77465400  | 3.21604600  | 3.05877300  | N                      | -1.71282400 | -0.53968600 | -0.96820100 |
| H                   | 2.82796100  | 4.41542000  | 1.12108100  | C                      | -3.14408800 | -0.83540100 | -0.85862400 |
| H                   | 1.84423400  | 0.52711500  | -0.43683200 | H                      | -3.43164800 | -1.43667300 | -1.72659400 |
| H                   | 1.72472000  | -0.36096400 | 1.87169000  | H                      | -3.30774900 | -1.42725600 | 0.04594000  |
| N                   | 1.18812500  | 3.46125300  | -0.65285500 | H                      | -3.77479600 | 0.06508700  | -0.81537500 |
| H                   | 1.70663200  | 4.29012400  | -0.92149700 | H                      | -1.49580600 | -0.02097400 | -1.82042000 |
| C                   | -0.07409000 | 3.36750200  | -1.13548500 | <b>Sub2-INT1-OAc-N</b> |             |             |             |
| O                   | -0.87677800 | 2.47882600  | -0.81415400 | Pd                     | 0.66804600  | 0.78055700  | 0.25050000  |
| C                   | -0.52265800 | 4.41870300  | -2.09897600 | C                      | -2.55462000 | 0.31666400  | -1.93971300 |

|                        |             |             |             |                        |             |             |             |
|------------------------|-------------|-------------|-------------|------------------------|-------------|-------------|-------------|
| C                      | -1.53305300 | -0.52489300 | -1.51826300 | H                      | -4.62869000 | 0.16260200  | 0.56903800  |
| C                      | -1.70306100 | -1.23186100 | -0.32846000 | H                      | -4.23454900 | 1.32751900  | -1.58038100 |
| C                      | -2.86296500 | -1.13625100 | 0.43266300  | O                      | 0.45035800  | -2.75071600 | -0.70630200 |
| C                      | -3.87733800 | -0.29106300 | -0.00483700 | C                      | -0.70564500 | 2.73291000  | 0.45301000  |
| C                      | -3.71846500 | 0.43547900  | -1.18111300 | O                      | -0.90222800 | 1.76301800  | 1.24384400  |
| H                      | -2.44344200 | 0.87732900  | -2.86543200 | C                      | 3.06277300  | -0.63231100 | -0.62259700 |
| H                      | -0.61607500 | -0.63926800 | -2.09526600 | O                      | 3.20585300  | -1.26483000 | 0.41409600  |
| H                      | -2.96683400 | -1.72550800 | 1.34165200  | O                      | 2.11712800  | 0.16354800  | -0.97064500 |
| H                      | -4.79438300 | -0.20262500 | 0.57378600  | C                      | 4.12660100  | -0.72640000 | -1.73848900 |
| H                      | -4.51584300 | 1.09548600  | -1.51868200 | C                      | -1.65695000 | 3.92596400  | 0.54247000  |
| O                      | 0.47624500  | -2.63345000 | -0.85006900 | O                      | 0.21957100  | 2.70468300  | -0.39541900 |
| C                      | -0.61671000 | 2.84906700  | 0.45355200  | N                      | 0.60566400  | -1.11579000 | 1.24459500  |
| O                      | -0.88906700 | 1.82846400  | 1.17068200  | H                      | 1.59529200  | -1.43801400 | 1.12253500  |
| C                      | 3.11620400  | -0.57415500 | -0.57933200 | C                      | 0.24330600  | -0.94810100 | 2.66296100  |
| O                      | 3.17279600  | -1.17835600 | 0.49672300  | H                      | 1.00939100  | -0.32031500 | 3.12863300  |
| O                      | 2.17973600  | 0.23876200  | -0.95286400 | H                      | -0.72492900 | -0.44215200 | 2.73943700  |
| C                      | 4.17863500  | -0.77277500 | -1.63060200 | H                      | 0.19839600  | -1.92067700 | 3.16456900  |
| H                      | 3.83620400  | -1.55172700 | -2.32333300 | S                      | -0.41173800 | -2.27995300 | 0.35709000  |
| H                      | 4.34686400  | 0.14215100  | -2.20587800 | O                      | -0.98623300 | -3.15939700 | 1.35802900  |
| H                      | 5.10501000  | -1.11238100 | -1.15895200 | F                      | 4.68079900  | 0.46975600  | -1.93575700 |
| C                      | -1.42864100 | 4.09144600  | 0.57246300  | F                      | 3.56508800  | -1.12016400 | -2.87966800 |
| H                      | -2.47903000 | 3.86314600  | 0.35745500  | F                      | 5.08074100  | -1.58504200 | -1.41811900 |
| H                      | -1.38020200 | 4.46514100  | 1.60168300  | F                      | -1.27238900 | 4.91140100  | -0.24865100 |
| H                      | -1.06361100 | 4.85647000  | -0.11788300 | F                      | -1.71267200 | 4.36523900  | 1.79466100  |
| O                      | 0.35679500  | 2.76793600  | -0.35735100 | F                      | -2.87927300 | 3.53224000  | 0.18055700  |
| N                      | 0.58617300  | -1.09208500 | 1.17403000  | <b>Sub2-INT1-OTf-N</b> |             |             |             |
| H                      | 1.60260800  | -1.36452400 | 1.06136300  | Pd                     | 0.23096300  | 0.76781700  | 0.02549600  |
| C                      | 0.18696900  | -0.95513300 | 2.58432500  | C                      | -2.54505200 | -0.23972900 | -2.31234800 |
| H                      | 0.93647000  | -0.32698900 | 3.07579400  | C                      | -1.53304000 | -0.98953200 | -1.72668500 |
| H                      | -0.78618900 | -0.45515000 | 2.64641900  | C                      | -1.75783300 | -1.52538200 | -0.45714500 |
| H                      | 0.13953400  | -1.93463700 | 3.07227600  | C                      | -2.96007500 | -1.35827700 | 0.22419100  |
| S                      | -0.37166200 | -2.24467700 | 0.25904200  | C                      | -3.96163600 | -0.60802900 | -0.38108100 |
| O                      | -0.89849300 | -3.20812100 | 1.21100800  | C                      | -3.74834300 | -0.04318600 | -1.63564900 |
| <b>Sub2-INT1-TFA-N</b> |             |             |             | H                      | -2.39164400 | 0.19760400  | -3.29619200 |
| Pd                     | 0.64756600  | 0.71760900  | 0.27802000  | H                      | -0.58205400 | -1.15533600 | -2.23191800 |
| C                      | -2.37849400 | 0.31738400  | -1.98439200 | H                      | -3.10056300 | -1.80862600 | 1.20491200  |
| C                      | -1.44252300 | -0.60105600 | -1.52615600 | H                      | -4.90814500 | -0.45635400 | 0.13258500  |
| C                      | -1.67023100 | -1.22244400 | -0.29733900 | H                      | -4.52912100 | 0.56071700  | -2.09336500 |
| C                      | -2.80852200 | -0.97526400 | 0.46423000  | O                      | 0.55090300  | -2.81949800 | -0.59846500 |
| C                      | -3.73432600 | -0.05313000 | -0.01105200 | O                      | -1.49928000 | 1.62561800  | 0.89914200  |
| C                      | -3.51248400 | 0.59601200  | -1.22252800 | O                      | 3.13018500  | -0.54982400 | 0.86325400  |
| H                      | -2.22009200 | 0.81822000  | -2.93686500 | O                      | 1.82806900  | 0.21589300  | -1.10071500 |
| H                      | -0.54541200 | -0.83228100 | -2.09928200 | C                      | 4.09078200  | -0.88817700 | -1.58265600 |
| H                      | -2.96104000 | -1.49890000 | 1.40602100  | C                      | -0.75857300 | 4.15896300  | 1.15412000  |



|                       |             |             |             |                       |             |             |             |
|-----------------------|-------------|-------------|-------------|-----------------------|-------------|-------------|-------------|
| O                     | -0.31889000 | 2.58919700  | -0.94567600 | O                     | -1.59457800 | 2.05825100  | 0.04861700  |
| N                     | 0.41079000  | -0.95687600 | 1.14116200  | C                     | -1.81446300 | 4.14803600  | -1.03092800 |
| H                     | 1.42948300  | -1.17109600 | 1.08108000  | H                     | -2.43447900 | 4.41717100  | -0.17176800 |
| C                     | 0.01922900  | -0.71269100 | 2.54125500  | H                     | -1.12430800 | 4.95591300  | -1.28838800 |
| H                     | 0.70000000  | 0.04564400  | 2.94257900  | H                     | -2.47790300 | 3.97945700  | -1.88809300 |
| H                     | -1.00885700 | -0.33759300 | 2.57688000  | C                     | -4.08863600 | -1.90091800 | 1.41274400  |
| H                     | 0.09972900  | -1.63545100 | 3.12564800  | H                     | -4.12229900 | -2.86452900 | 1.92841800  |
| S                     | -0.42286500 | -2.34272100 | 0.35919300  | H                     | -4.47118800 | -1.12281300 | 2.08450600  |
| O                     | -0.93415100 | -3.15775800 | 1.44476000  | H                     | -4.73556800 | -1.91244600 | 0.52952800  |
| F                     | 4.0995700   | -0.33032300 | -2.77888200 | O                     | -1.70966500 | -2.15605900 | 1.53988500  |
| F                     | 3.49920200  | -2.06563100 | -1.64156900 | H                     | 0.00697500  | -2.14805000 | 0.48152100  |
| F                     | 5.33088100  | -1.03494500 | -1.14984500 | <b>Sub2-TS1-TFA-N</b> |             |             |             |
| F                     | -0.55985900 | 5.26135300  | 0.46316100  | C                     | 3.60964700  | 0.89372600  | 1.68137700  |
| F                     | 0.38043800  | 3.73595900  | 1.67031000  | C                     | 3.30832000  | -0.16690000 | 0.82813400  |
| F                     | -1.63315000 | 4.37526100  | 2.11776600  | C                     | 2.13713400  | -0.09969400 | 0.09325200  |
| O                     | 3.87405000  | 1.48176000  | -0.39981200 | C                     | 1.22336400  | 0.96246600  | 0.17204300  |
| O                     | -2.68448700 | 3.37068200  | -0.49203200 | C                     | 1.54226600  | 1.98882700  | 1.07364300  |
| S                     | -1.43862900 | 2.86951900  | 0.02682200  | C                     | 2.72663300  | 1.96091000  | 1.80620800  |
| S                     | 3.19919700  | 0.20192100  | -0.39821500 | H                     | 4.52856200  | 0.87333200  | 2.26324900  |
| <b>Sub2-TS1-OAc-N</b> |             |             |             | H                     | 3.95571400  | -1.03803500 | 0.74822900  |
| C                     | 3.54986300  | 0.79897600  | 1.90261900  | H                     | 0.57544000  | 1.57810900  | -0.83695800 |
| C                     | 3.28994900  | -0.22622700 | 0.99625300  | H                     | 0.86837600  | 2.83863200  | 1.18117100  |
| C                     | 2.17433800  | -0.11634200 | 0.18168900  | H                     | 2.95689600  | 2.77756000  | 2.48738100  |
| C                     | 1.27374800  | 0.95894100  | 0.23005700  | S                     | 1.68748500  | -1.48526300 | -0.90925300 |
| C                     | 1.54925700  | 1.94801300  | 1.18445000  | O                     | 1.51234000  | -1.10270800 | -2.29515400 |
| C                     | 2.67635800  | 1.87681400  | 1.99890800  | O                     | 2.45915900  | -2.65420800 | -0.52972700 |
| H                     | 4.42498100  | 0.74247300  | 2.54653700  | N                     | 0.03975600  | -1.69155200 | -0.29222200 |
| H                     | 3.92494900  | -1.10781100 | 0.93336600  | C                     | -0.72810400 | -2.57852200 | -1.20226200 |
| H                     | 0.63186300  | 1.58385900  | -0.75089000 | H                     | -0.18283700 | -3.51892800 | -1.35199100 |
| H                     | 0.87774200  | 2.80032800  | 1.27249500  | H                     | -1.69784000 | -2.78818300 | -0.74856900 |
| H                     | 2.86921600  | 2.66714300  | 2.72198100  | H                     | -0.86807000 | -2.06963800 | -2.15851200 |
| S                     | 1.79614900  | -1.46861300 | -0.89453300 | Pd                    | -0.78442200 | 0.20964300  | 0.00482600  |
| O                     | 1.75375300  | -1.04051400 | -2.27936200 | C                     | -2.70627000 | -1.48251100 | 1.13022000  |
| O                     | 2.53721900  | -2.65183400 | -0.49264100 | O                     | -2.65574900 | -0.58797900 | 0.21192900  |
| N                     | 0.11166400  | -1.68572900 | -0.43862700 | C                     | -1.04019500 | 2.87891500  | -0.76054100 |
| C                     | -0.59805700 | -2.47743000 | -1.46902100 | O                     | -0.00422000 | 2.65773300  | -1.43145600 |
| H                     | -0.08987800 | -3.43768800 | -1.62544300 | O                     | -1.60150800 | 2.11060100  | 0.05990300  |
| H                     | -1.61382700 | -2.64876100 | -1.11172800 | C                     | -1.61526200 | 4.30058500  | -0.84976300 |
| H                     | -0.62168400 | -1.91058600 | -2.40247700 | C                     | -4.10706100 | -2.11743600 | 1.22312100  |
| Pd                    | -0.73626000 | 0.19468300  | -0.05289900 | O                     | -1.79852200 | -1.93288300 | 1.81615800  |
| C                     | -2.66536000 | -1.56314100 | 1.03468600  | H                     | 0.06100900  | -2.10203800 | 0.65331600  |
| O                     | -2.59157500 | -0.61076800 | 0.15342800  | F                     | -2.89116300 | 4.34238500  | -0.51190000 |
| C                     | -1.05828100 | 2.87827900  | -0.76451800 | F                     | -1.47126200 | 4.80228700  | -2.06497800 |
| O                     | 0.03731700  | 2.68936900  | -1.35839100 | F                     | -0.91685700 | 5.05104700  | 0.00993700  |

|                        |             |             |             |                         |             |             |             |
|------------------------|-------------|-------------|-------------|-------------------------|-------------|-------------|-------------|
| F                      | -4.21668300 | -2.99133300 | 0.20831100  | C                       | -2.78922200 | -0.54579100 | -0.15969900 |
| F                      | -5.08322500 | -1.22643800 | 1.10888800  | C                       | -3.74077600 | -1.46480400 | -0.58276600 |
| F                      | -4.26912800 | -2.78021200 | 2.35786900  | C                       | -5.05782200 | -1.03800800 | -0.72342800 |
| <b>Sub2-TS1-OTf-N</b>  |             |             |             | C                       | -5.39617700 | 0.28050400  | -0.43839400 |
| C                      | 3.49963800  | 0.87273800  | 1.73912900  | H                       | -4.69965200 | 2.21372800  | 0.21486500  |
| C                      | 3.25403500  | -0.15393400 | 0.82451900  | H                       | -2.33324200 | 1.47097400  | 0.47373100  |
| C                      | 2.08072500  | -0.10439500 | 0.09736200  | H                       | -3.44529800 | -2.48957800 | -0.79708000 |
| C                      | 1.11538200  | 0.90827900  | 0.23761800  | H                       | -5.81970900 | -1.73966600 | -1.05668200 |
| C                      | 1.36928100  | 1.88631400  | 1.21343400  | H                       | -6.42816600 | 0.60899800  | -0.54834300 |
| C                      | 2.56038500  | 1.87936000  | 1.93596100  | S                       | -1.11264300 | -1.08970800 | 0.00203400  |
| H                      | 4.42017700  | 0.86580200  | 2.31892600  | O                       | -1.02011800 | -2.51855900 | -0.23633900 |
| H                      | 3.94570900  | -0.98475200 | 0.69887800  | O                       | -0.36105900 | -0.15843300 | -0.90944800 |
| H                      | 0.54935200  | 1.57609400  | -0.78906900 | N                       | -0.70050300 | -0.76241700 | 1.55605800  |
| H                      | 0.63458500  | 2.67101200  | 1.38292300  | C                       | 0.11971800  | -1.74751600 | 2.26359000  |
| H                      | 2.74821500  | 2.65862700  | 2.67149000  | H                       | 1.12955800  | -1.85209100 | 1.84166300  |
| S                      | 1.67439300  | -1.44720900 | -0.97864000 | H                       | 0.19013100  | -1.41574800 | 3.30333100  |
| O                      | 1.51229300  | -0.99061300 | -2.34244900 | H                       | -0.37656800 | -2.72115000 | 2.23843900  |
| O                      | 2.45645100  | -2.62120900 | -0.64380100 | Pd                      | 1.64847700  | 0.27097400  | -0.43684400 |
| N                      | 0.01800500  | -1.71029200 | -0.39198500 | C                       | 0.32514200  | 2.65230200  | 0.33933700  |
| C                      | -0.75842700 | -2.48724700 | -1.39282200 | O                       | 1.16014100  | 2.20198100  | -0.53555100 |
| H                      | -0.23382600 | -3.42540900 | -1.61392900 | C                       | 3.72976500  | -0.92454400 | -0.07242700 |
| H                      | -1.73773600 | -2.69836900 | -0.96262400 | O                       | 2.64620600  | -1.55808000 | -0.28656700 |
| H                      | -0.86441600 | -1.89219800 | -2.30285500 | O                       | 3.66843600  | 0.34860900  | -0.03091700 |
| Pd                     | -0.83964300 | 0.12154800  | 0.05431300  | C                       | 5.02546700  | -1.63353000 | 0.09371800  |
| O                      | -2.69616200 | -0.79909100 | 0.28799600  | H                       | 5.69015100  | -1.06044700 | 0.74715400  |
| O                      | 0.00825700  | 2.53846200  | -1.53878700 | H                       | 4.85757900  | -2.63820700 | 0.49287400  |
| O                      | -1.65007500 | 2.06623000  | 0.21242100  | H                       | 5.50925500  | -1.72959200 | -0.88618600 |
| C                      | -1.33395000 | 4.55301300  | -0.48639900 | C                       | -0.03850900 | 4.10127200  | 0.12165100  |
| C                      | -4.16148300 | -2.69187800 | 1.21016200  | H                       | -0.29339100 | 4.56594700  | 1.07875500  |
| O                      | -3.15490300 | -0.78215800 | 2.74950200  | H                       | 0.76928500  | 4.64898200  | -0.37150900 |
| H                      | 0.01849700  | -2.22602300 | 0.50494700  | H                       | -0.92272400 | 4.14449800  | -0.52774200 |
| F                      | -0.37101500 | 4.67397700  | 0.41578500  | O                       | -0.18685700 | 2.01119300  | 1.26411800  |
| F                      | -2.49102900 | 4.87106700  | 0.05183400  | H                       | -0.40700500 | 0.22884700  | 1.63334800  |
| F                      | -1.07639400 | 5.33608200  | -1.51313200 | <b>Sub2-INT1-OAc-NH</b> |             |             |             |
| F                      | -3.86334300 | -3.42642500 | 0.14324600  | Pd                      | 0.88730100  | 0.40396300  | -0.76480400 |
| F                      | -5.24793400 | -1.98644300 | 0.96578700  | C                       | -3.74776800 | 0.95512600  | -0.05635500 |
| F                      | -4.37131900 | -3.49257300 | 2.23995600  | C                       | -2.97260600 | -0.09038300 | -0.54084000 |
| O                      | -1.59342200 | -2.46696000 | 1.74798200  | C                       | -1.94672500 | -0.59037600 | 0.25475500  |
| O                      | -2.42688900 | 2.74019400  | -2.09672500 | C                       | -1.68982300 | -0.08126400 | 1.52323700  |
| S                      | -2.75518000 | -1.57731200 | 1.60659800  | C                       | -2.47204600 | 0.96737700  | 1.99780900  |
| S                      | -1.40872800 | 2.81129500  | -1.07905500 | C                       | -3.49553700 | 1.48382100  | 1.20795100  |
| <b>Sub2-INT1-OAc-O</b> |             |             |             | H                       | -4.55131100 | 1.36148800  | -0.66744200 |
| C                      | -4.42533100 | 1.18516600  | -0.01051300 | H                       | -3.14513900 | -0.51450800 | -1.52804900 |
| C                      | -3.10492600 | 0.78037100  | 0.12995000  | H                       | -0.88749800 | -0.51132000 | 2.12046900  |

|   |             |             |             |
|---|-------------|-------------|-------------|
| H | -2.28764200 | 1.37479800  | 2.99043000  |
| H | -4.10753900 | 2.30266900  | 1.58312000  |
| O | -1.79477800 | -2.91375100 | -1.01500900 |
| N | -0.14176500 | -1.09213800 | -1.61308100 |
| C | 2.58731500  | -0.93150600 | 1.12026100  |
| O | 2.36206700  | -0.93804900 | -0.09560500 |
| C | 0.36142700  | 2.77794800  | -0.28205500 |
| O | -0.38354200 | 2.08892200  | -1.03536900 |
| O | 1.43590800  | 2.25523500  | 0.18423200  |
| C | 0.01632000  | 4.18885300  | 0.05283600  |
| H | 0.12764900  | 4.35112200  | 1.13052700  |
| H | 0.71543700  | 4.86462600  | -0.45430500 |
| H | -1.00450500 | 4.41925400  | -0.26346000 |
| C | 3.14117100  | -2.12960600 | 1.79853400  |
| H | 3.59722500  | -1.88090200 | 2.75940900  |
| H | 2.29364500  | -2.81064400 | 1.95750500  |
| H | 3.85274200  | -2.63423800 | 1.13965700  |
| O | 2.33198900  | 0.08376700  | 1.91451700  |
| H | 1.98093300  | 0.85974200  | 1.40900000  |
| C | 0.67822400  | -1.99780300 | -2.41619600 |
| H | 1.47235300  | -2.49892200 | -1.84220100 |
| H | 0.02800600  | -2.76214200 | -2.86400100 |
| H | 1.12861300  | -1.41336600 | -3.22568700 |
| S | -0.94049700 | -1.91212900 | -0.38412600 |
| O | -0.04267200 | -2.34193200 | 0.69790600  |

### Sub3

|   |             |             |             |
|---|-------------|-------------|-------------|
| C | -2.33863900 | 0.85805500  | 0.49445300  |
| C | -0.99263800 | 1.18421500  | 0.40031000  |
| C | -0.07428800 | 0.25573800  | -0.09413400 |
| C | -0.52877900 | -0.98922200 | -0.53456700 |
| C | -1.88044200 | -1.30821400 | -0.45950100 |
| C | -2.78440000 | -0.38996400 | 0.06544200  |
| H | -3.04640700 | 1.58263700  | 0.89355700  |
| H | -0.62688500 | 2.16477700  | 0.69901900  |
| H | 0.17166500  | -1.70218900 | -0.96793800 |
| H | -2.22943600 | -2.27549100 | -0.81726100 |
| H | -3.84140200 | -0.64332900 | 0.13092500  |
| C | 1.34716200  | 0.70020300  | -0.22037200 |
| O | 1.62310800  | 1.85928500  | -0.49080700 |
| N | 2.33719600  | -0.23562500 | -0.05356000 |
| H | 3.25256400  | 0.17931500  | -0.18689100 |
| C | 2.28069500  | -1.48851300 | 0.66928100  |
| H | 3.10649400  | -1.54155400 | 1.38916500  |
| H | 1.34434000  | -1.56124500 | 1.23097600  |

|   |            |             |            |
|---|------------|-------------|------------|
| H | 2.35180400 | -2.36161300 | 0.00435000 |
|---|------------|-------------|------------|

### Sub3-INT1-OAc

|    |             |             |             |
|----|-------------|-------------|-------------|
| C  | -5.52900200 | -1.37744700 | 0.33745800  |
| C  | -4.49527500 | -1.70388400 | 1.21960800  |
| C  | -3.23158100 | -1.14185900 | 1.05470200  |
| C  | -2.99949900 | -0.22441200 | 0.01879000  |
| C  | -4.03675600 | 0.09281400  | -0.87042200 |
| C  | -5.29559500 | -0.48707100 | -0.71234400 |
| H  | -6.51183200 | -1.82344400 | 0.46246300  |
| H  | -4.67173800 | -2.40412100 | 2.03095200  |
| H  | -2.41475200 | -1.40665600 | 1.71773400  |
| H  | -3.85535300 | 0.76437100  | -1.70373400 |
| H  | -6.09046800 | -0.24748100 | -1.41290200 |
| C  | -1.61763300 | 0.31433400  | -0.14841100 |
| O  | -0.67057900 | -0.50172300 | 0.04603600  |
| N  | -1.39338200 | 1.58516800  | -0.49325200 |
| C  | -2.33914300 | 2.69359300  | -0.51779300 |
| H  | -1.85096800 | 3.57306100  | -0.08740800 |
| H  | -2.65022900 | 2.93963400  | -1.53997700 |
| H  | -3.22468300 | 2.46261100  | 0.07594400  |
| Pd | 1.38078100  | -0.32058500 | -0.16166000 |
| C  | 3.13547800  | -2.01353400 | -0.21980600 |
| O  | 1.91283200  | -2.34916400 | -0.06459500 |
| O  | 3.38859100  | -0.76802100 | -0.37411500 |
| C  | 1.94303200  | 2.35254000  | 0.59339600  |
| O  | 1.36013300  | 1.69356900  | -0.40397400 |
| O  | 2.31013000  | 1.84446800  | 1.64005900  |
| C  | 2.12860600  | 3.83243100  | 0.28256600  |
| H  | 2.49070500  | 4.35241100  | 1.17127000  |
| H  | 2.85632900  | 3.94586400  | -0.52851800 |
| H  | 1.19154200  | 4.28632000  | -0.05813000 |
| C  | 4.23902600  | -3.02736800 | -0.18931400 |
| H  | 3.86269900  | -4.00307600 | -0.50543000 |
| H  | 5.06375000  | -2.70485400 | -0.82961900 |
| H  | 4.61555500  | -3.11496000 | 0.83672200  |
| H  | -0.39161500 | 1.81722300  | -0.57811100 |

### Sub3-INT1-TFA

|   |             |             |             |
|---|-------------|-------------|-------------|
| C | -5.43696900 | -1.33256500 | 0.38785700  |
| C | -4.35622000 | -1.72747500 | 1.17209700  |
| C | -3.10225700 | -1.17313700 | 0.95657100  |
| C | -2.93152900 | -0.19549500 | -0.02762000 |
| C | -4.01573000 | 0.19102900  | -0.82052000 |
| C | -5.26424700 | -0.38221900 | -0.61436800 |
| H | -6.41784100 | -1.77492900 | 0.55228100  |

|    |             |             |             |   |             |             |             |
|----|-------------|-------------|-------------|---|-------------|-------------|-------------|
| H  | -4.48944700 | -2.47785900 | 1.94859200  | O | -4.74393300 | 1.47573000  | -1.47944100 |
| H  | -2.24330400 | -1.48868000 | 1.54476300  | C | -4.52211900 | -0.60379500 | 0.12753500  |
| H  | -3.87715700 | 0.91586700  | -1.62112400 | F | -5.20722300 | -1.35893900 | -0.70970200 |
| H  | -6.10360200 | -0.08963000 | -1.24195100 | F | -5.32989100 | -0.06145000 | 1.01469600  |
| C  | -1.56806300 | 0.33996800  | -0.25147100 | F | -3.61282900 | -1.34298200 | 0.74517800  |
| O  | -0.62712300 | -0.49742800 | -0.16658300 | O | -2.84040400 | 1.45187500  | 0.19523400  |
| N  | -1.36541100 | 1.62382900  | -0.53555300 | S | 1.07043400  | 2.36976200  | 0.71595100  |
| C  | -2.30560200 | 2.72410600  | -0.41160900 | O | 1.03155900  | 2.75621800  | -0.68451800 |
| H  | -1.77956700 | 3.57449300  | 0.03231000  | O | 0.22810800  | 1.10379900  | 0.98227200  |
| H  | -2.69948300 | 3.03186700  | -1.38836400 | C | 2.74689800  | 1.66414300  | 0.98926700  |
| H  | -3.13978600 | 2.44715200  | 0.23851200  | F | 2.99468300  | 0.69348500  | 0.10025800  |
| Pd | 1.41067100  | -0.34644100 | -0.25396500 | F | 2.84617600  | 1.14544300  | 2.20369300  |
| C  | 3.12186900  | -2.03766000 | -0.13474200 | F | 3.65514200  | 2.61010000  | 0.83871600  |
| O  | 1.91105200  | -2.38479600 | -0.06370500 | O | 0.91478800  | 3.35241500  | 1.76738500  |
| O  | 3.43335700  | -0.82275500 | -0.28256900 | C | 3.30481100  | -2.59527800 | -1.16777600 |
| C  | 1.96029400  | 2.30270800  | 0.46085300  | H | 2.84680800  | -3.35638600 | -0.53098000 |
| O  | 1.42155600  | 1.65031900  | -0.52927500 | H | 3.67580100  | -3.07767600 | -2.07741400 |
| O  | 2.42436500  | 1.87223200  | 1.48927400  | H | 4.15142500  | -2.14441200 | -0.63344500 |
| C  | 1.91180100  | 3.81572000  | 0.16775800  | N | 2.31986900  | -1.59482400 | -1.52616900 |
| C  | 4.20182400  | -3.11401500 | -0.03903200 | H | 2.50934200  | -1.00021900 | -2.32821100 |
| H  | -0.38393000 | 1.87140900  | -0.70125900 |   |             |             |             |
| F  | 2.37886200  | 4.52530000  | 1.17835200  |   |             |             |             |
| F  | 0.63262000  | 4.18751900  | -0.04570600 |   |             |             |             |
| F  | 2.60391800  | 4.11722800  | -0.92637500 |   |             |             |             |
| F  | 5.41121900  | -2.58944400 | -0.13603700 |   |             |             |             |
| F  | 4.09229500  | -3.74746100 | 1.12426700  |   |             |             |             |
| F  | 4.03026500  | -3.99737800 | -1.01840300 |   |             |             |             |

### Sub3-INT1-OTf

|    |             |             |             |  |  |  |  |
|----|-------------|-------------|-------------|--|--|--|--|
| C  | 1.18364700  | -1.28750300 | -0.89911200 |  |  |  |  |
| O  | 0.44116900  | -0.43186100 | -1.45339100 |  |  |  |  |
| Pd | -1.06078400 | 0.52180600  | -0.46199100 |  |  |  |  |
| C  | 0.80536600  | -1.95279300 | 0.36445900  |  |  |  |  |
| C  | -0.48253400 | -2.48574800 | 0.47497900  |  |  |  |  |
| C  | 1.67016900  | -1.96795400 | 1.46062200  |  |  |  |  |
| C  | -0.89108600 | -3.05509700 | 1.67375300  |  |  |  |  |
| H  | -1.15455600 | -2.46202200 | -0.38341800 |  |  |  |  |
| C  | 1.24669100  | -2.52114500 | 2.66215600  |  |  |  |  |
| H  | 2.65115800  | -1.50198800 | 1.38697100  |  |  |  |  |
| C  | -0.02840600 | -3.06924800 | 2.76667800  |  |  |  |  |
| H  | -1.89067800 | -3.47636100 | 1.75736700  |  |  |  |  |
| H  | 1.91046900  | -2.51192500 | 3.52391800  |  |  |  |  |
| H  | -0.35621000 | -3.50206200 | 3.70986400  |  |  |  |  |
| S  | -3.69591400 | 0.73779500  | -0.82803300 |  |  |  |  |
| O  | -2.69482900 | 0.00131800  | -1.69757900 |  |  |  |  |

### Sub3-TS1-OAc

|    |             |             |             |  |  |  |  |
|----|-------------|-------------|-------------|--|--|--|--|
| C  | -3.22593700 | -2.36700100 | -0.71506500 |  |  |  |  |
| C  | -1.88410700 | -2.15020600 | -0.41327700 |  |  |  |  |
| C  | -1.41765900 | -0.89519800 | -0.01136800 |  |  |  |  |
| C  | -2.35708300 | 0.16169500  | 0.05114700  |  |  |  |  |
| C  | -3.69862700 | -0.05169500 | -0.26100600 |  |  |  |  |
| C  | -4.13607300 | -1.31958600 | -0.63048500 |  |  |  |  |
| H  | -3.56161600 | -3.35614600 | -1.02162000 |  |  |  |  |
| H  | -1.17969900 | -2.98007800 | -0.45659800 |  |  |  |  |
| H  | -0.41112500 | -1.20702700 | 0.80847200  |  |  |  |  |
| H  | -4.40217500 | 0.78115400  | -0.27594700 |  |  |  |  |
| H  | -5.18412100 | -1.48158300 | -0.87467200 |  |  |  |  |
| C  | -1.82626400 | 1.52538800  | 0.25234900  |  |  |  |  |
| O  | -0.64694000 | 1.79523700  | -0.07175100 |  |  |  |  |
| N  | -2.61931200 | 2.49117700  | 0.73770200  |  |  |  |  |
| C  | -2.12694700 | 3.84235700  | 0.93655000  |  |  |  |  |
| H  | -1.67163900 | 4.20856400  | 0.01132300  |  |  |  |  |
| H  | -2.96574200 | 4.48789800  | 1.20731300  |  |  |  |  |
| H  | -1.36765800 | 3.87480100  | 1.72739200  |  |  |  |  |
| Pd | 0.48873600  | 0.06335700  | -0.43027400 |  |  |  |  |
| C  | 3.02419900  | 1.13424000  | -0.08580000 |  |  |  |  |
| O  | 2.09950700  | 1.11137900  | -1.00730900 |  |  |  |  |
| O  | 2.94176000  | 0.62785300  | 1.02508500  |  |  |  |  |
| C  | 1.45936100  | -2.23173500 | 0.70247600  |  |  |  |  |

|   |             |             |             |
|---|-------------|-------------|-------------|
| O | 1.61539200  | -1.63269700 | -0.41071700 |
| O | 0.48978200  | -2.04726800 | 1.48624200  |
| C | 2.54202100  | -3.19338700 | 1.08804400  |
| H | 2.18995400  | -3.89823000 | 1.84520400  |
| H | 2.92781700  | -3.71692600 | 0.20864700  |
| H | 3.36084300  | -2.59448100 | 1.50736900  |
| C | 4.26125800  | 1.87622000  | -0.54835600 |
| H | 3.99394200  | 2.87297000  | -0.91689700 |
| H | 4.97496100  | 1.95957800  | 0.27615300  |
| H | 4.72445000  | 1.33687000  | -1.38310900 |
| H | -3.51054600 | 2.22378600  | 1.13179300  |

### Sub3-TS1-TFA

|    |             |             |             |
|----|-------------|-------------|-------------|
| C  | -3.08602200 | -2.40941900 | -0.68897600 |
| C  | -1.74956200 | -2.14888700 | -0.39565400 |
| C  | -1.32626900 | -0.87549400 | -0.00190000 |
| C  | -2.29831300 | 0.15410200  | 0.05161700  |
| C  | -3.63164100 | -0.10450900 | -0.25461000 |
| C  | -4.02800900 | -1.39079900 | -0.60954300 |
| H  | -3.39072900 | -3.41140200 | -0.98468400 |
| H  | -1.02550900 | -2.96274700 | -0.43411400 |
| H  | -0.33587600 | -1.17990800 | 0.88013800  |
| H  | -4.36331500 | 0.70334700  | -0.27580000 |
| H  | -5.07104400 | -1.58932000 | -0.84712100 |
| C  | -1.79595500 | 1.52934700  | 0.23190500  |
| O  | -0.60676900 | 1.80080900  | -0.07062700 |
| N  | -2.60128900 | 2.50213600  | 0.66771800  |
| C  | -2.12388000 | 3.86601200  | 0.82801100  |
| H  | -1.66782600 | 4.21037100  | -0.10517000 |
| H  | -2.97126900 | 4.50836300  | 1.07692600  |
| H  | -1.36990800 | 3.92652100  | 1.62163900  |
| Pd | 0.54615800  | 0.10804000  | -0.38793500 |
| C  | 2.99943100  | 1.29673300  | 0.02494000  |
| O  | 2.14899600  | 1.20773600  | -0.94019200 |
| O  | 2.93309000  | 0.83076700  | 1.14653300  |
| C  | 1.46173300  | -2.23062900 | 0.70822900  |
| O  | 1.70815900  | -1.58847300 | -0.34253900 |
| O  | 0.52954300  | -2.03211400 | 1.52377300  |
| C  | 2.31437700  | -3.48164800 | 0.96079800  |
| C  | 4.21886100  | 2.13821600  | -0.40659200 |
| H  | -3.51055200 | 2.24735000  | 1.02812500  |
| F  | 4.81022600  | 1.60226600  | -1.47553400 |
| F  | 5.11721200  | 2.22296000  | 0.56539800  |
| F  | 3.83604200  | 3.37827300  | -0.72726600 |
| F  | 3.44436000  | -3.46410200 | 0.27839800  |

|   |            |             |            |
|---|------------|-------------|------------|
| F | 1.59022300 | -4.53558500 | 0.56418500 |
| F | 2.58633100 | -3.61905300 | 2.24858200 |

### Sub3-TS1-OTf

|    |             |             |             |
|----|-------------|-------------|-------------|
| Pd | -0.23440400 | -0.17274900 | -0.10281000 |
| C  | -2.18158500 | 0.20513600  | 0.59820000  |
| C  | -3.70674000 | 0.42516100  | 2.47640400  |
| C  | -4.52336800 | -0.56628600 | 1.94555200  |
| C  | -4.16600600 | -1.20853700 | 0.76214100  |
| C  | -3.01169600 | -0.82752500 | 0.08763600  |
| H  | -3.97453000 | 0.90729100  | 3.41428000  |
| H  | -5.42997200 | -0.86440400 | 2.46788900  |
| H  | -4.77102500 | -2.04331600 | 0.40841700  |
| C  | -2.46377000 | -1.58816600 | -1.04940600 |
| C  | -2.53678500 | 0.79393200  | 1.81690500  |
| H  | -1.90691100 | 1.57520300  | 2.24108300  |
| O  | -1.23422300 | -1.50491200 | -1.30681800 |
| C  | -2.66886300 | -3.20110800 | -2.85941200 |
| H  | -1.77621700 | -3.72022100 | -2.49792100 |
| H  | -3.41526000 | -3.93320000 | -3.17478600 |
| H  | -2.38394200 | -2.57505700 | -3.71313900 |
| H  | -1.68111200 | 1.29409800  | -0.08935700 |
| S  | 0.05700200  | 2.80014300  | 0.30161800  |
| O  | 0.60564000  | 1.50926900  | 0.85315400  |
| O  | 0.11840200  | 3.92921100  | 1.19750000  |
| C  | 1.13737500  | 3.17200300  | -1.14295800 |
| F  | 2.36386900  | 3.37118700  | -0.70940000 |
| F  | 0.68548300  | 4.25705700  | -1.74249400 |
| F  | 1.11179400  | 2.15242600  | -1.98021200 |
| O  | -1.29094700 | 2.53732700  | -0.34480600 |
| S  | 2.02910900  | -2.15774400 | -0.15208700 |
| O  | 2.94232500  | -2.86045900 | -1.03025600 |
| O  | 0.89922700  | -2.85927700 | 0.44935200  |
| C  | 3.03756100  | -1.58517800 | 1.27176800  |
| F  | 3.50467100  | -2.63498900 | 1.93010700  |
| F  | 2.28089300  | -0.86289900 | 2.09145900  |
| F  | 4.04950700  | -0.84544800 | 0.85215800  |
| O  | 1.60217900  | -0.81069500 | -0.75331600 |
| N  | -3.22867500 | -2.39464700 | -1.78533200 |
| H  | -4.22983300 | -2.37153400 | -1.64927300 |

### Sub4

|   |             |             |             |
|---|-------------|-------------|-------------|
| C | 1.95523200  | -1.13691700 | -0.00005200 |
| C | 0.57071700  | -1.21687900 | -0.00001000 |
| C | -0.20612300 | -0.05415900 | 0.00000600  |
| C | 0.42809200  | 1.19123300  | -0.00002000 |

|   |             |             |             |
|---|-------------|-------------|-------------|
| C | 1.81588600  | 1.27244200  | -0.00006200 |
| C | 2.57960000  | 0.10914300  | -0.00007800 |
| H | 2.55352900  | -2.04646600 | -0.00006400 |
| H | 0.05526800  | -2.17539400 | 0.00001000  |
| H | -0.16013900 | 2.10788600  | -0.00000800 |
| H | 2.30312800  | 2.24592900  | -0.00008300 |
| H | 3.66667700  | 0.17319400  | -0.00011100 |
| C | -1.69102200 | -0.20302100 | 0.00005100  |
| O | -2.20735200 | -1.30508800 | 0.00007300  |
| C | -2.53688700 | 1.04630800  | 0.00007300  |
| H | -2.33071500 | 1.66474800  | 0.88385200  |
| H | -2.33077800 | 1.66473400  | -0.88373000 |
| H | -3.59111800 | 0.75717700  | 0.00011200  |

### Sub4-INT1-OAc

|    |             |             |             |
|----|-------------|-------------|-------------|
| C  | 5.37695800  | -0.06046200 | -0.78844200 |
| C  | 4.26903400  | 0.08072200  | -1.62164700 |
| C  | 2.99002200  | -0.06291900 | -1.10596600 |
| C  | 2.81512200  | -0.33191000 | 0.25995600  |
| C  | 3.93186500  | -0.45583900 | 1.09531500  |
| C  | 5.20930000  | -0.33255200 | 0.56732400  |
| H  | 6.38021600  | 0.04757600  | -1.19747700 |
| H  | 4.40454800  | 0.30721300  | -2.67718900 |
| H  | 2.10632600  | 0.06504100  | -1.72932600 |
| H  | 3.80850400  | -0.67772200 | 2.15395100  |
| H  | 6.07713300  | -0.44555900 | 1.21392500  |
| C  | 1.43708800  | -0.45902800 | 0.75405200  |
| O  | 0.56441800  | -0.76171200 | -0.07416200 |
| Pd | -1.45520600 | -0.37113400 | 0.12681100  |
| C  | -3.56632500 | -1.57301800 | 0.01511100  |
| O  | -2.46470200 | -2.20208900 | -0.05809900 |
| O  | -3.51810400 | -0.30919100 | 0.17947000  |
| C  | -0.42770800 | 2.13861900  | -0.59856900 |
| O  | -0.95487700 | 1.54089900  | 0.44337200  |
| O  | -0.15559100 | 1.60115100  | -1.66042400 |
| C  | -0.19927000 | 3.61282000  | -0.34543500 |
| H  | 0.41138500  | 4.03616900  | -1.14771400 |
| H  | -1.16646200 | 4.12887900  | -0.31760100 |
| H  | 0.28162900  | 3.77647400  | 0.62537300  |
| C  | -4.87289900 | -2.27282400 | -0.11522500 |
| H  | -4.76612400 | -3.32811100 | 0.15215700  |
| H  | -5.62579000 | -1.78728900 | 0.51336800  |
| H  | -5.21114100 | -2.20999000 | -1.15689200 |
| C  | 1.07300400  | -0.17074400 | 2.17117900  |
| H  | 0.54060800  | 0.79172200  | 2.17277600  |

|   |            |             |            |
|---|------------|-------------|------------|
| H | 0.36088300 | -0.92547400 | 2.52799000 |
| H | 1.92784500 | -0.10537700 | 2.84846300 |

### Sub4-INT1-TFA

|    |             |             |             |
|----|-------------|-------------|-------------|
| C  | -1.42152300 | 0.92860100  | -0.69526900 |
| O  | -0.46715400 | 0.35632300  | -1.25150200 |
| Pd | 1.24473500  | -0.25419800 | -0.26854200 |
| C  | 3.64486900  | -0.12974400 | -0.51981400 |
| O  | 2.90988200  | 0.50666700  | -1.32392500 |
| O  | 3.13775200  | -0.81427000 | 0.41117400  |
| C  | -0.70894400 | -2.03794300 | 0.61137300  |
| O  | -0.02544600 | -1.03359200 | 1.06075100  |
| O  | -0.58935100 | -2.64476900 | -0.42948000 |
| C  | -1.87861400 | -2.34794000 | 1.56860700  |
| C  | 5.16123700  | -0.04296800 | -0.68713000 |
| C  | -1.26098700 | 1.77976800  | 0.48843600  |
| C  | -0.06311000 | 2.48263000  | 0.67737300  |
| C  | -2.29709700 | 1.90651800  | 1.42070700  |
| C  | 0.09307700  | 3.29893200  | 1.78697100  |
| H  | 0.72966400  | 2.41319600  | -0.06802800 |
| C  | -2.12397800 | 2.70272800  | 2.54376100  |
| H  | -3.22194900 | 1.34780000  | 1.28926200  |
| C  | -0.93269100 | 3.40067600  | 2.72456700  |
| H  | 1.01640200  | 3.85779400  | 1.92281500  |
| H  | -2.91952100 | 2.77858400  | 3.28172900  |
| H  | -0.80318900 | 4.03186200  | 3.60179100  |
| F  | 5.54430200  | 1.22246000  | -0.53111900 |
| F  | 5.78630400  | -0.79569800 | 0.20150200  |
| F  | 5.49812700  | -0.43780700 | -1.90954400 |
| F  | -1.52119600 | -2.33699100 | 2.84614100  |
| F  | -2.81717500 | -1.38781500 | 1.39996700  |
| F  | -2.44029700 | -3.51216300 | 1.29310800  |
| C  | -2.77458800 | 0.70039900  | -1.28077300 |
| H  | -3.41045400 | 1.59030300  | -1.23946600 |
| H  | -2.67510000 | 0.33314800  | -2.30563800 |
| H  | -3.25345900 | -0.09377600 | -0.68672100 |

### Sub4-INT1-OTf

|    |             |             |             |
|----|-------------|-------------|-------------|
| C  | 1.42997400  | -1.21624900 | -0.60709900 |
| O  | 0.69528600  | -0.43896300 | -1.24046800 |
| Pd | -0.98175300 | 0.47079900  | -0.47800400 |
| C  | 1.03670400  | -1.79288100 | 0.68527400  |
| C  | -0.28177500 | -2.23470300 | 0.85841300  |
| C  | 1.94881800  | -1.88394600 | 1.74100100  |
| C  | -0.68191500 | -2.75776300 | 2.07868400  |
| H  | -0.97925000 | -2.20309200 | 0.02098100  |

|   |             |             |             |   |             |             |             |
|---|-------------|-------------|-------------|---|-------------|-------------|-------------|
| C | 1.53253900  | -2.38056500 | 2.96877600  | H | -3.77312400 | -2.18743700 | 0.00898400  |
| H | 2.96335000  | -1.50639800 | 1.62510300  | C | -1.24838500 | -1.88409200 | -0.92122000 |
| C | 0.22224800  | -2.81997800 | 3.13653500  | H | 4.86166200  | -1.08992100 | 0.94054000  |
| H | -1.70320700 | -3.11084100 | 2.20499300  | H | 4.46992900  | -2.25401600 | -0.32536900 |
| H | 2.23213200  | -2.41885200 | 3.80076100  | H | 4.28529500  | -2.72425900 | 1.39493400  |
| H | -0.09720400 | -3.21360700 | 4.09949200  | H | 1.78317100  | 4.37400300  | -1.25452300 |
| S | -3.57493900 | 0.50456700  | -1.10800000 | H | 1.56861900  | 4.49947500  | 0.49896900  |
| O | -2.45138500 | -0.21898900 | -1.82785700 | H | 0.23636400  | 4.97065800  | -0.62122200 |
| O | -4.59573300 | 1.12861400  | -1.90428300 | C | -2.19512200 | 1.22929400  | 0.90452300  |
| C | -4.40861700 | -0.82269000 | -0.13702600 | H | -1.77317200 | 2.20289700  | 1.14845100  |
| F | -4.95099800 | -1.68317700 | -0.97579700 | O | -0.02078900 | -1.71027800 | -0.99562900 |
| F | -5.33646600 | -0.27719600 | 0.62011400  | C | -1.82142200 | -3.14973800 | -1.46869300 |
| F | -3.52227300 | -1.44801200 | 0.62566400  | H | -2.11397600 | -3.81301100 | -0.64341700 |
| O | -2.86349900 | 1.33667200  | -0.06337400 | H | -2.71475700 | -2.95753900 | -2.07481100 |
| S | 0.90672900  | 2.48742400  | 0.82412200  | H | -1.06241600 | -3.66002100 | -2.06714100 |
| O | 0.90289500  | 2.86251500  | -0.57961200 |   |             |             |             |
| O | 0.09884600  | 1.19160400  | 1.06337800  |   |             |             |             |
| C | 2.59768100  | 1.84880200  | 1.16729400  |   |             |             |             |
| F | 2.93358700  | 0.91820500  | 0.26410200  |   |             |             |             |
| F | 2.65523900  | 1.29667900  | 2.36887600  |   |             |             |             |
| F | 3.46794000  | 2.83686000  | 1.09168400  |   |             |             |             |
| O | 0.66744000  | 3.46199800  | 1.86630600  |   |             |             |             |
| C | 2.71490800  | -1.61966500 | -1.24519600 |   |             |             |             |
| H | 3.53528900  | -1.61394900 | -0.51924600 |   |             |             |             |
| H | 2.61777200  | -2.65232500 | -1.60760100 |   |             |             |             |
| H | 2.94689400  | -0.95723900 | -2.08295500 |   |             |             |             |

### Sub4-TS1-OAc

|    |             |             |             |
|----|-------------|-------------|-------------|
| Pd | 0.63546400  | 0.09870800  | -0.15544800 |
| C  | -1.48956600 | 0.38144400  | 0.04724300  |
| H  | -0.84213900 | 1.26965900  | -0.73566100 |
| O  | -0.47277600 | 2.57456900  | -1.11849100 |
| O  | 1.21168200  | 2.02065400  | 0.25554600  |
| C  | 0.54997400  | 2.85732000  | -0.43660600 |
| C  | 1.05641300  | 4.27088500  | -0.43939100 |
| C  | -3.44445500 | 0.87858200  | 1.41112400  |
| C  | -4.02690800 | -0.33577500 | 1.06493100  |
| C  | -3.33894900 | -1.21516600 | 0.23844400  |
| C  | -2.07591100 | -0.87859100 | -0.25432000 |
| O  | 2.56993300  | -0.44120600 | -0.19252900 |
| C  | 2.75603400  | -1.40993300 | 0.66182600  |
| O  | 1.88406000  | -1.87643300 | 1.38553500  |
| C  | 4.18269500  | -1.90818700 | 0.67425900  |
| H  | -3.97029700 | 1.56422400  | 2.07339700  |
| H  | -5.00760800 | -0.60524100 | 1.45129100  |

### Sub4-TS1-TFA

|    |             |             |             |
|----|-------------|-------------|-------------|
| Pd | -0.55059100 | 0.20940700  | -0.03224900 |
| C  | -0.02391000 | -1.78945400 | 0.50485800  |
| H  | -0.90636100 | -1.68821000 | -0.54115100 |
| O  | -2.12456200 | -1.93587500 | -1.13333300 |
| O  | -2.59639500 | -0.06357600 | 0.02363600  |
| C  | -2.90419400 | -1.09473000 | -0.62253600 |
| C  | -4.39762900 | -1.44136500 | -0.69762700 |
| C  | -0.01168000 | -3.64612700 | 2.07572000  |
| C  | 1.37656000  | -3.70468100 | 2.03331500  |
| C  | 2.08173300  | -2.78993500 | 1.25953200  |
| C  | 1.39900700  | -1.82764600 | 0.51429000  |
| O  | -0.81956100 | 2.18375800  | -0.37090500 |
| C  | -0.20197000 | 2.86827400  | 0.53058600  |
| O  | 0.42457800  | 2.45909900  | 1.49048900  |
| C  | -0.33067000 | 4.38040000  | 0.25574200  |
| H  | -0.56683700 | -4.34876300 | 2.69425600  |
| H  | 1.91192300  | -4.45106100 | 2.61597700  |
| H  | 3.17076000  | -2.80314200 | 1.26868100  |
| C  | 2.11315900  | -0.71684900 | -0.11044600 |
| C  | -0.70162000 | -2.69875100 | 1.32065300  |
| H  | -1.79126900 | -2.70293100 | 1.33299300  |
| O  | 1.47771900  | 0.30511500  | -0.43115200 |
| F  | -5.16782100 | -0.40738300 | -0.41651600 |
| F  | -4.71533900 | -1.90643100 | -1.89619800 |
| F  | -4.61918100 | -2.40281100 | 0.20574200  |
| F  | 0.27683800  | 5.09401100  | 1.19418200  |
| F  | 0.22173200  | 4.68420700  | -0.92180300 |
| F  | -1.61248700 | 4.74569400  | 0.21636100  |

|   |            |             |             |
|---|------------|-------------|-------------|
| C | 3.58734900 | -0.72859300 | -0.32879000 |
| H | 4.10539000 | -0.63137100 | 0.63506900  |
| H | 3.91598400 | -1.66661900 | -0.79175900 |
| H | 3.86778000 | 0.12086100  | -0.95673400 |

### Sub4-TS1-OTf

|    |             |             |             |
|----|-------------|-------------|-------------|
| Pd | -0.27830100 | -0.02194700 | 0.05105900  |
| C  | 0.72472000  | -1.56942300 | 1.05884300  |
| H  | -0.18370500 | -2.05907500 | 0.15053600  |
| C  | 1.27255500  | -2.74904600 | 3.10802700  |
| C  | 2.63090100  | -2.59021300 | 2.85841700  |
| C  | 3.05615300  | -1.88688900 | 1.73410100  |
| C  | 2.11853500  | -1.36498600 | 0.84647200  |
| H  | 0.94219100  | -3.28008000 | 3.99847600  |
| H  | 3.36396800  | -2.99744800 | 3.55127400  |
| H  | 4.11972600  | -1.71584400 | 1.57355400  |
| C  | 2.49741000  | -0.43105800 | -0.21139500 |
| C  | 0.32678700  | -2.23518000 | 2.22050800  |
| H  | -0.73338400 | -2.39138800 | 2.41710500  |
| O  | 1.60957900  | 0.27057200  | -0.73332100 |
| S  | -2.51955700 | -2.03075300 | -0.01889700 |
| O  | -1.22449000 | -2.74928400 | -0.34365900 |
| O  | -2.20206200 | -0.68538900 | 0.58746700  |
| C  | -3.19491800 | -1.62459200 | -1.68392300 |
| F  | -2.31007800 | -0.90288200 | -2.34616400 |
| F  | -4.31032800 | -0.94393100 | -1.53015600 |
| F  | -3.43298500 | -2.74892300 | -2.33105800 |
| O  | -3.51487600 | -2.80156100 | 0.68513400  |
| S  | -0.57008600 | 2.95139600  | -0.10732500 |
| O  | -1.02580100 | 1.67100500  | -0.82615700 |
| O  | -0.53497800 | 4.08242100  | -1.01025200 |
| C  | -1.99894800 | 3.23758400  | 1.01053200  |
| F  | -3.10782400 | 3.39015600  | 0.30860800  |
| F  | -1.78020900 | 4.32626100  | 1.73097500  |
| F  | -2.13869400 | 2.19872500  | 1.82729100  |
| O  | 0.55457300  | 2.68142200  | 0.78524900  |
| C  | 3.90481300  | -0.23767100 | -0.65485100 |
| H  | 4.47117300  | 0.27702600  | 0.13344300  |
| H  | 4.39709600  | -1.19825400 | -0.84842800 |
| H  | 3.92211600  | 0.38458200  | -1.55314800 |

### Sub5

|   |            |             |             |
|---|------------|-------------|-------------|
| C | 2.46283800 | 1.02162900  | -0.00003400 |
| C | 1.08843400 | 1.21513900  | -0.00002600 |
| C | 0.22729800 | 0.11609100  | -0.00001000 |
| C | 0.74923000 | -1.17917600 | -0.00000200 |

|   |             |             |             |
|---|-------------|-------------|-------------|
| C | 2.12542800  | -1.36923400 | -0.00001100 |
| C | 2.98160600  | -0.27101600 | -0.00002700 |
| H | 3.13309200  | 1.87933600  | -0.00004600 |
| H | 0.65442600  | 2.21303700  | -0.00003100 |
| H | 0.07215800  | -2.03000200 | 0.00001000  |
| H | 2.53308600  | -2.37862200 | -0.00000600 |
| H | 4.05986400  | -0.42359100 | -0.00003300 |
| C | -1.23057500 | 0.38671000  | -0.00000100 |
| O | -1.72463700 | 1.49203200  | 0.00000100  |
| O | -1.96146300 | -0.74305700 | 0.00003300  |
| C | -3.36890800 | -0.54374000 | 0.00005400  |
| H | -3.68079300 | 0.01514500  | -0.88920200 |
| H | -3.81438500 | -1.54076300 | 0.00011400  |
| H | -3.68075400 | 0.01523700  | 0.88926400  |

### Sub5-INT1-OAc

|    |             |             |             |
|----|-------------|-------------|-------------|
| Pd | -1.17030200 | -0.47462200 | 0.22927300  |
| C  | 0.82810200  | 2.17966800  | 0.35186200  |
| O  | -2.31339200 | 1.16295200  | 0.90362000  |
| O  | -2.98936500 | -0.16369600 | -0.68901200 |
| C  | -3.20864800 | 0.84603300  | 0.05787500  |
| C  | -4.48603900 | 1.60203200  | -0.04327500 |
| C  | 2.10619200  | 3.50859400  | -1.19911600 |
| C  | 3.05576100  | 2.49392300  | -1.29923700 |
| C  | 2.90137900  | 1.32466000  | -0.56912000 |
| C  | 1.78340500  | 1.16527400  | 0.25279400  |
| O  | -0.62778500 | -2.14222100 | -0.71489800 |
| C  | 0.57528100  | -2.31046700 | -1.17762200 |
| O  | 1.54319400  | -1.57603000 | -1.00386400 |
| C  | 0.67475500  | -3.57027200 | -2.01250100 |
| H  | 2.23182900  | 4.42675000  | -1.77088800 |
| H  | 3.91687700  | 2.61450000  | -1.95361200 |
| H  | 3.61930200  | 0.51241900  | -0.65120100 |
| C  | 1.61572700  | -0.06793600 | 1.03804400  |
| H  | 0.09333600  | -3.44160500 | -2.93303600 |
| H  | 0.24470300  | -4.42296800 | -1.47611300 |
| H  | 1.71993500  | -3.76731100 | -2.26658500 |
| H  | -5.23630800 | 1.12651400  | 0.60056200  |
| H  | -4.85884000 | 1.57988700  | -1.07176700 |
| H  | -4.34440900 | 2.63223300  | 0.29653900  |
| C  | 0.99692900  | 3.35315500  | -0.37273200 |
| H  | 0.25938500  | 4.14900400  | -0.28996700 |
| O  | 0.53570400  | -0.53466500 | 1.43366500  |
| O  | 2.75153100  | -0.60672800 | 1.42355300  |
| C  | 2.66560600  | -1.88485400 | 2.05865600  |



|                      |             |             |             |                     |             |             |             |
|----------------------|-------------|-------------|-------------|---------------------|-------------|-------------|-------------|
| H                    | 3.69739000  | -2.19084800 | 2.23774900  | C                   | 1.71872800  | -1.87575200 | 1.42942400  |
| H                    | 2.11583600  | -1.80845500 | 3.00141700  | C                   | -0.82431200 | -3.00173700 | 1.68647100  |
| H                    | 2.16081400  | -2.58815200 | 1.38903400  | H                   | -1.11811700 | -2.44586800 | -0.37701500 |
| H                    | -0.03574900 | 2.05488300  | 1.00304700  | C                   | 1.31413000  | -2.41392800 | 2.64359700  |
| <b>Sub5-INT1-TFA</b> |             |             |             | H                   | 2.68890700  | -1.39030800 | 1.34222600  |
| Pd                   | 0.48394000  | -0.50286400 | -0.58231900 | C                   | 0.04919000  | -2.98149300 | 2.77030200  |
| C                    | 0.62009300  | 2.76279200  | 0.11937000  | H                   | -1.81554000 | -3.43858500 | 1.78670200  |
| O                    | 2.45542100  | 0.24858300  | -0.82607300 | H                   | 1.98520900  | -2.37768200 | 3.49882000  |
| O                    | 2.03722900  | -1.64621200 | 0.19296000  | H                   | -0.26186300 | -3.40242900 | 3.72436100  |
| C                    | 2.85867800  | -0.77957200 | -0.21695800 | S                   | -3.73210300 | 0.71936100  | -0.83933500 |
| C                    | 4.35885800  | -0.95567100 | 0.01376100  | O                   | -2.71234100 | 0.02650100  | -1.72363100 |
| C                    | 0.42650800  | 4.08596500  | 2.12154900  | O                   | -4.79052400 | 1.45687700  | -1.47262000 |
| C                    | -0.94852500 | 3.86152300  | 2.14963700  | C                   | -4.53493900 | -0.66215600 | 0.07976400  |
| C                    | -1.54714200 | 3.09587200  | 1.16007700  | F                   | -5.19989500 | -1.41005600 | -0.77894200 |
| C                    | -0.75962700 | 2.53997100  | 0.14846200  | F                   | -5.35646800 | -0.15722800 | 0.97561600  |
| O                    | -1.06803700 | -1.69815300 | -0.21010500 | F                   | -3.61238500 | -1.39675900 | 0.68380200  |
| C                    | -2.11279700 | -1.21022500 | 0.35792100  | O                   | -2.88968800 | 1.42041100  | 0.20614900  |
| O                    | -2.33679400 | -0.07769900 | 0.74801600  | S                   | 0.97631600  | 2.38395600  | 0.79011200  |
| C                    | -3.24900900 | -2.25371600 | 0.43428400  | O                   | 0.85401500  | 2.85566100  | -0.57801100 |
| H                    | 0.89193200  | 4.68970300  | 2.89878400  | O                   | 0.14802200  | 1.09825700  | 1.01950800  |
| H                    | -1.55408000 | 4.28134800  | 2.95009100  | C                   | 2.66899400  | 1.67554800  | 0.92884500  |
| H                    | -2.61469400 | 2.89014300  | 1.17767400  | F                   | 2.86373500  | 0.73706100  | -0.00562800 |
| C                    | -1.38109900 | 1.72177800  | -0.89929600 | F                   | 2.84166400  | 1.11332700  | 2.11722100  |
| C                    | 1.20891500  | 3.54223800  | 1.10634000  | F                   | 3.56325300  | 2.62948500  | 0.75914500  |
| H                    | 2.28092900  | 3.72573500  | 1.08105900  | O                   | 0.87115000  | 3.29024900  | 1.91324800  |
| O                    | -0.82338300 | 0.79727600  | -1.52256900 | O                   | 2.25571600  | -1.54045800 | -1.61572700 |
| O                    | -2.59446600 | 2.09366300  | -1.22323000 | C                   | 3.14792300  | -2.58578200 | -1.22616700 |
| C                    | -3.32518800 | 1.24908000  | -2.12385300 | H                   | 2.62118900  | -3.39316700 | -0.70828100 |
| H                    | -4.28142900 | 1.75081500  | -2.27535200 | H                   | 3.59019500  | -2.95529600 | -2.15329400 |
| H                    | -2.78759900 | 1.14268100  | -3.06980100 | H                   | 3.93271900  | -2.17142800 | -0.58484400 |
| H                    | -3.47492900 | 0.26786600  | -1.66226900 | <b>Sub5-TS1-OAc</b> |             |             |             |
| H                    | 1.22498800  | 2.34456000  | -0.68302800 | Pd                  | 0.71633500  | -0.00625300 | -0.07266500 |
| F                    | -4.05096900 | -2.00483500 | 1.45987800  | C                   | -1.16581200 | 1.04223200  | 0.10114400  |
| F                    | -3.97132100 | -2.14728500 | -0.69343300 | H                   | -0.28072300 | 1.55792600  | -0.77641300 |
| F                    | -2.81407500 | -3.50167300 | 0.52948300  | O                   | 0.51373400  | 2.58987000  | -1.29892000 |
| F                    | 4.98187900  | -0.99910100 | -1.15950900 | O                   | 1.93541700  | 1.62323900  | 0.14218100  |
| F                    | 4.61510200  | -2.06503200 | 0.68383100  | C                   | 1.58943800  | 2.56335500  | -0.64108900 |
| F                    | 4.82197000  | 0.08584800  | 0.69947000  | C                   | 2.55802200  | 3.70132600  | -0.78761400 |
| <b>Sub5-INT1-OTf</b> |             |             |             | C                   | -2.76004900 | 2.33627700  | 1.40900000  |
| C                    | 1.17816900  | -1.23350300 | -0.93595600 | C                   | -3.74485500 | 1.37517100  | 1.20632900  |
| O                    | 0.44558400  | -0.38224300 | -1.46205500 | C                   | -3.44710500 | 0.22597400  | 0.48412600  |
| Pd                   | -1.10024000 | 0.53715500  | -0.46197800 | C                   | -2.17187800 | 0.05606200  | -0.05188400 |
| C                    | 0.84016100  | -1.89062700 | 0.34399300  | O                   | 2.34599200  | -1.17956800 | -0.07099400 |
| C                    | -0.43768900 | -2.44411400 | 0.47514600  | C                   | 2.21487200  | -2.09432000 | 0.85024100  |

|   |             |             |             |   |             |             |             |
|---|-------------|-------------|-------------|---|-------------|-------------|-------------|
| O | 1.25038800  | -2.19462000 | 1.59959100  | C | -2.30287700 | -3.41468600 | -1.27217800 |
| C | 3.39858100  | -3.03202800 | 0.91086000  | H | -3.23002500 | -3.96640200 | -1.42843000 |
| H | -2.98321300 | 3.22806500  | 1.99228400  | H | -1.71105900 | -3.37826100 | -2.19139400 |
| H | -4.73912000 | 1.51072600  | 1.62693100  | H | -1.70686800 | -3.86253600 | -0.47165000 |
| H | -4.18799800 | -0.56118400 | 0.36098500  | F | 3.26233800  | -4.06534600 | 1.81744000  |
| C | -1.76890600 | -1.23404500 | -0.61801000 | F | 4.53565800  | -2.51111700 | 1.03671600  |
| H | 4.29843200  | -2.47326300 | 1.19372800  | F | 3.43821600  | -3.79013600 | -0.31375700 |
| H | 3.58812400  | -3.47142600 | -0.07502900 | F | 3.62582500  | 3.61530100  | -0.03424300 |
| H | 3.21116100  | -3.82104400 | 1.64460700  | F | 2.60868100  | 4.27324700  | -1.81577100 |
| H | 3.23971800  | 3.46844500  | -1.61480400 | F | 1.75503800  | 4.68466800  | 0.12732100  |
| H | 3.15606100  | 3.81934200  | 0.11979300  |   |             |             |             |
| H | 2.02703300  | 4.62517300  | -1.03235100 |   |             |             |             |
| C | -1.49008800 | 2.16875100  | 0.86300500  |   |             |             |             |
| H | -0.74308200 | 2.94947200  | 0.99642700  |   |             |             |             |
| O | -0.58021300 | -1.55073800 | -0.75041900 |   |             |             |             |
| O | -2.73946800 | -2.06540100 | -0.93735300 |   |             |             |             |
| C | -2.33416600 | -3.36425900 | -1.38859700 |   |             |             |             |
| H | -3.25956200 | -3.91721700 | -1.55398800 |   |             |             |             |
| H | -1.76244700 | -3.27835700 | -2.31765400 |   |             |             |             |
| H | -1.71647800 | -3.85030000 | -0.62734200 |   |             |             |             |

### Sub5-TS1-TFA

|    |             |             |             |  |  |  |  |
|----|-------------|-------------|-------------|--|--|--|--|
| Pd | 0.72955800  | -0.04569100 | -0.06738700 |  |  |  |  |
| C  | -1.11493900 | 1.04113300  | 0.03270800  |  |  |  |  |
| H  | -0.21393900 | 1.53407800  | -0.87541400 |  |  |  |  |
| O  | 0.60195000  | 2.52211400  | -1.36571800 |  |  |  |  |
| O  | 1.95720000  | 1.59262200  | 0.17266600  |  |  |  |  |
| C  | 1.61156200  | 2.50266500  | -0.61998500 |  |  |  |  |
| C  | 2.44347900  | 3.79250100  | -0.59293000 |  |  |  |  |
| C  | -2.71087200 | 2.43517400  | 1.22610600  |  |  |  |  |
| C  | -3.71542000 | 1.49392200  | 1.03028300  |  |  |  |  |
| C  | -3.42912300 | 0.30293900  | 0.37182300  |  |  |  |  |
| C  | -2.14349700 | 0.07528700  | -0.11114900 |  |  |  |  |
| O  | 2.34413300  | -1.26111600 | -0.02930200 |  |  |  |  |
| C  | 2.19435200  | -2.16984200 | 0.87278600  |  |  |  |  |
| O  | 1.27304800  | -2.31414500 | 1.65492800  |  |  |  |  |
| C  | 3.38165900  | -3.15440400 | 0.86065200  |  |  |  |  |
| H  | -2.92770200 | 3.35858200  | 1.75979500  |  |  |  |  |
| H  | -4.71877100 | 1.67738000  | 1.40846600  |  |  |  |  |
| H  | -4.18815700 | -0.46850000 | 0.26008600  |  |  |  |  |
| C  | -1.74725600 | -1.24624400 | -0.60052300 |  |  |  |  |
| C  | -1.42580100 | 2.20874100  | 0.73702000  |  |  |  |  |
| H  | -0.66665400 | 2.97987600  | 0.86476700  |  |  |  |  |
| O  | -0.55286200 | -1.57517300 | -0.68760400 |  |  |  |  |
| O  | -2.70806500 | -2.08717800 | -0.89691000 |  |  |  |  |

### Sub5-TS1-OTf

|    |             |             |             |  |  |  |  |
|----|-------------|-------------|-------------|--|--|--|--|
| Pd | -0.22766600 | -0.11668300 | -0.13695100 |  |  |  |  |
| C  | -2.16930200 | 0.24140400  | 0.60014300  |  |  |  |  |
| C  | -3.72428700 | 0.45958000  | 2.45131100  |  |  |  |  |
| C  | -4.55082800 | -0.51085000 | 1.89532400  |  |  |  |  |
| C  | -4.18203500 | -1.15228600 | 0.71514900  |  |  |  |  |
| C  | -3.00178200 | -0.78526300 | 0.08088900  |  |  |  |  |
| H  | -4.00348800 | 0.93987700  | 3.38696200  |  |  |  |  |
| H  | -5.47654200 | -0.78870600 | 2.39466800  |  |  |  |  |
| H  | -4.78761800 | -1.95727100 | 0.30403900  |  |  |  |  |
| C  | -2.44695200 | -1.56514800 | -1.02719000 |  |  |  |  |
| C  | -2.53678000 | 0.82337000  | 1.81811100  |  |  |  |  |
| H  | -1.91314100 | 1.60141300  | 2.25687000  |  |  |  |  |
| O  | -1.26096100 | -1.42922100 | -1.37586600 |  |  |  |  |
| O  | -3.22798400 | -2.44202200 | -1.60093200 |  |  |  |  |
| C  | -2.61765800 | -3.28852800 | -2.59515200 |  |  |  |  |
| H  | -1.75911700 | -3.80867900 | -2.16024000 |  |  |  |  |
| H  | -3.39727000 | -3.98935300 | -2.89332100 |  |  |  |  |
| H  | -2.28865400 | -2.68396900 | -3.44507800 |  |  |  |  |
| H  | -1.67935200 | 1.33856700  | -0.06644800 |  |  |  |  |
| S  | 0.06769300  | 2.83683900  | 0.35611100  |  |  |  |  |
| O  | 0.61913800  | 1.52494200  | 0.86103600  |  |  |  |  |
| O  | 0.12864800  | 3.92823800  | 1.29731600  |  |  |  |  |
| C  | 1.15180300  | 3.26228000  | -1.07132500 |  |  |  |  |
| F  | 2.37623300  | 3.44816800  | -0.62691200 |  |  |  |  |
| F  | 0.69864600  | 4.36623600  | -1.63291900 |  |  |  |  |
| F  | 1.13031800  | 2.27192100  | -1.94301500 |  |  |  |  |
| O  | -1.27703400 | 2.59351400  | -0.30070600 |  |  |  |  |
| S  | 1.98481700  | -2.13533500 | -0.30136600 |  |  |  |  |
| O  | 2.88975300  | -2.80740800 | -1.21050400 |  |  |  |  |
| O  | 0.82355200  | -2.84103700 | 0.23577900  |  |  |  |  |
| C  | 2.98345600  | -1.68368200 | 1.17227200  |  |  |  |  |
| F  | 3.40177200  | -2.78607800 | 1.77369300  |  |  |  |  |
| F  | 2.23372800  | -0.98580000 | 2.01897500  |  |  |  |  |

|   |            |             |             |
|---|------------|-------------|-------------|
| F | 4.02589300 | -0.95536800 | 0.81404700  |
| O | 1.60131200 | -0.74115000 | -0.82020700 |

## Tri-Pd-OAc

|    |             |             |             |
|----|-------------|-------------|-------------|
| Pd | 1.77947300  | 0.34790700  | 0.00490800  |
| C  | 1.64302300  | -1.96340100 | 1.89521500  |
| O  | 2.37417000  | -1.17295900 | 1.23884100  |
| O  | 0.42111500  | -2.21696900 | 1.70559900  |
| C  | -2.51599300 | -0.57069700 | -1.87245000 |
| O  | -2.59347500 | 0.51876200  | -1.24392700 |
| O  | -1.70229500 | -1.51667000 | -1.67564800 |
| C  | -3.53048100 | -0.78606400 | -2.96219700 |
| H  | -3.14442900 | -1.48458400 | -3.70948200 |
| H  | -4.43176300 | -1.22531900 | -2.51701800 |
| H  | -3.80412400 | 0.16696900  | -3.42272800 |
| C  | 2.31178000  | -2.67634700 | 3.03861000  |
| H  | 2.58679500  | -1.94152900 | 3.80386000  |
| H  | 1.65105500  | -3.43204000 | 3.46963800  |
| H  | 3.23865300  | -3.14021500 | 2.68479900  |
| Pd | -1.18653500 | 1.36771400  | -0.02229200 |
| C  | -2.55565600 | -0.41953800 | 1.85366900  |
| O  | -2.21639600 | -1.45794200 | 1.22550900  |
| O  | -2.15187900 | 0.76205600  | 1.66241900  |
| C  | 1.75082900  | -1.92392800 | -1.84153500 |
| O  | 2.16156100  | -0.74210800 | -1.66877300 |
| O  | 0.85096700  | -2.52630300 | -1.19682800 |
| C  | -3.58596600 | -0.59966700 | 2.93491700  |
| H  | -3.50134500 | -1.59341100 | 3.38252100  |
| H  | -3.48173200 | 0.18088400  | 3.69353300  |
| H  | -4.58215900 | -0.50647300 | 2.48509800  |
| Pd | -0.58686300 | -1.71287600 | 0.01272700  |
| C  | 0.79478300  | 2.44259900  | -1.88922600 |
| O  | 1.76471300  | 1.98190200  | -1.22836500 |
| O  | -0.43443400 | 2.21895100  | -1.70842100 |
| C  | 1.15502800  | 3.35931100  | -3.02624100 |
| H  | 1.70422900  | 2.78851300  | -3.78363100 |
| H  | 0.26116600  | 3.80342600  | -3.47030800 |
| H  | 1.82586700  | 4.14391600  | -2.66020200 |
| C  | 0.88327000  | 2.43573700  | 1.85156700  |
| O  | 1.71190800  | 1.49879000  | 1.68074400  |
| O  | -0.16632900 | 2.66282900  | 1.19080700  |
| C  | 1.17148300  | 3.39773400  | 2.97166400  |
| H  | 1.18035200  | 4.41918200  | 2.57581300  |
| H  | 0.36322500  | 3.34168900  | 3.70931500  |
| H  | 2.12911000  | 3.17143700  | 3.44617600  |

|   |            |             |             |
|---|------------|-------------|-------------|
| C | 2.43404700 | -2.71686300 | -2.92213300 |
| H | 2.95563700 | -2.05308100 | -3.61630500 |
| H | 3.16995800 | -3.38186900 | -2.45376900 |
| H | 1.70620400 | -3.33978000 | -3.44992900 |

## Tri-Pd-TFA

|    |             |             |             |
|----|-------------|-------------|-------------|
| Pd | 0.00023800  | -1.67794800 | 0.79373100  |
| C  | -1.83986200 | -2.10004000 | -1.51610600 |
| O  | -1.27505600 | -2.58921000 | -0.51231200 |
| O  | -1.63377300 | -1.02569300 | -2.12208500 |
| C  | 1.83937300  | 2.31876900  | -1.15399200 |
| O  | 1.27439000  | 2.63799000  | -0.08406100 |
| O  | 1.63313600  | 1.35761600  | -1.92704400 |
| C  | 2.97177300  | 3.28926600  | -1.55953400 |
| C  | -2.97131700 | -2.99219700 | -2.07513700 |
| Pd | -0.00086700 | 1.52612300  | 1.05625800  |
| C  | -1.84093100 | 2.36267200  | -1.06015600 |
| O  | -1.27605900 | 1.73804700  | -1.98571500 |
| O  | -1.63466900 | 2.35045400  | 0.17324000  |
| C  | 1.84050600  | -2.15840500 | -1.43052600 |
| O  | 1.63401400  | -2.34752100 | -0.21169500 |
| O  | 1.27554700  | -1.39143800 | -2.24198600 |
| C  | 2.97344000  | -2.99435200 | -2.06799000 |
| C  | -2.97293500 | 3.29224800  | -1.55323700 |
| Pd | -0.00030300 | 0.15165600  | -1.84955500 |
| C  | 1.84006700  | -0.15904600 | 2.58476400  |
| O  | 1.27572100  | -1.24560600 | 2.32630800  |
| O  | 1.63292200  | 0.99093800  | 2.13915600  |
| C  | 2.97307300  | -0.29257700 | 3.62742500  |
| C  | -1.84027400 | -0.26406100 | 2.57663700  |
| O  | -1.63345600 | -1.32607100 | 1.94953600  |
| O  | -1.27608900 | 0.85014700  | 2.49822500  |
| C  | -2.97258200 | -0.30217900 | 3.62787700  |
| F  | 2.46981900  | -0.79769400 | 4.74712300  |
| F  | 3.89717100  | -1.12163200 | 3.15810900  |
| F  | 3.53219700  | 0.87334800  | 3.89178100  |
| F  | 3.53314600  | -3.80606000 | -1.19061600 |
| F  | 2.46991400  | -3.71169200 | -3.06500100 |
| F  | 3.89712600  | -2.17323700 | -2.55178900 |
| F  | 3.89514800  | 3.29918900  | -0.60626200 |
| F  | 3.53216100  | 2.93485200  | -2.70072200 |
| F  | 2.46726900  | 4.51087100  | -1.68340800 |
| F  | -2.46487000 | -4.17569500 | -2.39936300 |
| F  | -3.89363300 | -3.16109300 | -1.13588300 |
| F  | -3.53351200 | -2.45529800 | -3.14173700 |

|   |             |             |             |
|---|-------------|-------------|-------------|
| F | -2.46855300 | 0.01421300  | 4.81449800  |
| F | -3.53135300 | -1.49570700 | 3.69947200  |
| F | -3.89713200 | 0.59193600  | 3.30034300  |
| F | -3.89560600 | 2.56239700  | -2.16753500 |
| F | -3.53436700 | 3.94847000  | -0.55520100 |
| F | -2.46738100 | 4.16394200  | -2.41744100 |

## Tri-Pd-OTf

|    |             |             |             |
|----|-------------|-------------|-------------|
| Pd | 1.15126000  | 1.27017200  | -0.44421400 |
| Pd | 0.56847500  | -1.59931800 | 0.50363700  |
| Pd | -2.37138000 | 0.41225200  | -0.18648600 |
| C  | -1.58760600 | 4.34391700  | 1.61161300  |
| S  | -0.98486900 | 2.60164000  | 1.49800400  |
| O  | -0.16072200 | 2.69957400  | 0.22970300  |
| O  | -2.28036400 | 1.85631800  | 1.24621000  |
| O  | -0.29543900 | 2.23833400  | 2.70811000  |
| F  | -0.54427200 | 5.13113300  | 1.76461900  |
| F  | -2.23438600 | 4.64908500  | 0.50766700  |
| F  | -2.38583200 | 4.43242600  | 2.65240000  |
| C  | -2.25273000 | -2.85015000 | 2.97065700  |
| S  | -1.94453800 | -1.09159500 | 2.49233300  |
| O  | -2.78455200 | -0.99798000 | 1.23791600  |
| O  | -0.46278800 | -1.03090800 | 2.18178600  |
| O  | -2.31920400 | -0.26431400 | 3.60785700  |
| F  | -3.54048400 | -3.00025200 | 3.19381900  |
| F  | -1.86074100 | -3.65821600 | 2.00633200  |
| F  | -1.56560300 | -3.09115500 | 4.06716200  |
| C  | 4.45260600  | 0.31268900  | 2.01307800  |
| S  | 2.60562600  | 0.30535600  | 2.14195300  |
| O  | 2.29172000  | -1.01188500 | 1.47322000  |
| O  | 2.22524100  | 1.48682400  | 1.26730300  |
| O  | 2.25868000  | 0.44088700  | 3.53128800  |
| F  | 4.91643100  | -0.81078300 | 2.51882300  |
| F  | 4.81419500  | 0.42576800  | 0.75181500  |
| F  | 4.89701800  | 1.34266700  | 2.70176300  |
| C  | -2.90704000 | -3.56326500 | -1.74935000 |
| S  | -1.65359100 | -2.20761100 | -1.72448400 |
| O  | -1.02629500 | -2.51351200 | -0.38376700 |
| O  | -2.54036400 | -0.97927300 | -1.65632600 |
| O  | -0.82220800 | -2.27808300 | -2.89681300 |
| F  | -2.27556700 | -4.71752300 | -1.77942000 |
| F  | -3.64841700 | -3.47494800 | -0.66493300 |
| F  | -3.64902300 | -3.41860900 | -2.82557200 |
| C  | -0.47676600 | 3.46975000  | -2.88302200 |
| S  | -1.08423700 | 1.69447500  | -2.69758600 |

|   |             |             |             |
|---|-------------|-------------|-------------|
| O | -2.14660500 | 1.84035600  | -1.63243700 |
| O | 0.11200300  | 0.92291000  | -2.17396500 |
| O | -1.52053400 | 1.23123100  | -3.98753700 |
| F | -0.65200800 | 3.82571100  | -4.13358400 |
| F | -1.14408700 | 4.26799100  | -2.08360900 |
| F | 0.81059300  | 3.50889500  | -2.58111400 |
| C | 4.22713600  | -1.91464600 | -1.57806000 |
| S | 2.54965600  | -1.20714300 | -1.90827500 |
| O | 2.67782900  | 0.13491000  | -1.22652000 |
| O | 1.65206800  | -2.14673800 | -1.12627300 |
| O | 2.33394000  | -1.20942500 | -3.33019000 |
| F | 5.13807300  | -1.06133100 | -1.99575400 |
| F | 4.36759700  | -2.13534500 | -0.28735900 |
| F | 4.32252600  | -3.04756200 | -2.24108700 |

## OAc

|   |             |             |             |
|---|-------------|-------------|-------------|
| O | -0.74818600 | -1.13336700 | 0.00281200  |
| O | -0.74546700 | 1.13473300  | 0.00284000  |
| C | -0.21941700 | 0.00007600  | -0.01277600 |
| C | 1.34367300  | -0.00118600 | -0.00499400 |
| H | 1.70222700  | -0.00158700 | 1.03714300  |
| H | 1.75103600  | 0.89917600  | -0.48785700 |
| H | 1.75041900  | -0.90185700 | -0.48787900 |

## TFA

|   |             |             |             |
|---|-------------|-------------|-------------|
| O | 1.50914800  | -1.14468700 | -0.00004700 |
| O | 1.58357200  | 1.13477700  | -0.00005600 |
| C | 1.05559000  | 0.01228600  | -0.00010900 |
| C | -0.51105900 | 0.01626100  | -0.00003000 |
| F | -1.07790700 | 1.23799000  | -0.00113800 |
| F | -1.01724900 | -0.62514600 | -1.07781000 |
| F | -1.01694800 | -0.62306600 | 1.07913100  |

## OTf

|   |             |             |             |
|---|-------------|-------------|-------------|
| S | -0.91135500 | 0.00014500  | -0.00014900 |
| O | -1.22130600 | -1.10788100 | -0.91409600 |
| O | -1.22165000 | -0.23748000 | 1.41635900  |
| C | 0.92711100  | 0.00003600  | 0.00002300  |
| F | 1.41890000  | -1.16460000 | 0.43832900  |
| F | 1.41992100  | 0.96149800  | 0.78947400  |
| F | 1.42043400  | 0.20254500  | -1.22721600 |
| O | -1.22132800 | 1.34566900  | -0.50264300 |

## Sub5-TS2-PdOAc-OAc

|    |             |             |             |
|----|-------------|-------------|-------------|
| Pd | -0.70393000 | -0.17332800 | 0.39416800  |
| C  | 0.74272900  | 1.27685100  | -0.25590500 |
| H  | 1.00410300  | 0.92866000  | 0.92494100  |
| O  | -3.01497600 | 1.29709800  | -0.85786300 |

|   |             |             |             |                           |             |             |             |
|---|-------------|-------------|-------------|---------------------------|-------------|-------------|-------------|
| O | -1.99343300 | 1.16723100  | 1.15283500  | C                         | -2.32075500 | 2.62888300  | 1.35233200  |
| C | -2.91920300 | 1.56318300  | 0.33016700  | C                         | -3.32444200 | 1.68303300  | 1.14398800  |
| C | -3.94248000 | 2.44348800  | 1.03469800  | C                         | -3.06867000 | 0.54184200  | 0.38997300  |
| C | 0.92941400  | 3.28127600  | -1.59959300 | C                         | -1.80017200 | 0.36480800  | -0.14856900 |
| C | 1.71127800  | 2.59942100  | -2.53149500 | O                         | 2.61872200  | -1.02500600 | 0.44029400  |
| C | 2.00878300  | 1.25162100  | -2.34924000 | C                         | 2.28178900  | -2.11734900 | 1.05398000  |
| C | 1.51827400  | 0.60347900  | -1.22368900 | O                         | 1.15015500  | -2.47583100 | 1.35406200  |
| O | -2.13978500 | -1.58979700 | 0.66014700  | C                         | 3.49627500  | -2.96437100 | 1.40647200  |
| C | -2.39903800 | -2.26982900 | -0.41388600 | H                         | -2.53169100 | 3.51359500  | 1.95282900  |
| O | -1.82904200 | -2.19438000 | -1.49424000 | H                         | -4.31216500 | 1.83464600  | 1.57790600  |
| C | -3.56591800 | -3.22595600 | -0.20462800 | H                         | -3.83740800 | -0.21287600 | 0.23303300  |
| H | 0.69245400  | 4.33266100  | -1.76188200 | C                         | -1.38785300 | -0.83088700 | -0.89510200 |
| H | 2.08410000  | 3.12090100  | -3.41260000 | H                         | 4.05975000  | -2.46895200 | 2.20710500  |
| H | 2.59933200  | 0.70211100  | -3.08030800 | H                         | 4.16839600  | -3.05909300 | 0.54560900  |
| C | 1.67828400  | -0.83673600 | -0.97592400 | H                         | 3.17822400  | -3.95403100 | 1.75007200  |
| H | -4.49506400 | -2.64732500 | -0.12783800 | H                         | 2.95534700  | 3.63580900  | 2.36299800  |
| H | -3.45061900 | -3.78337500 | 0.73231700  | H                         | 4.12662600  | 2.34582500  | 2.64383300  |
| H | -3.64206400 | -3.91719000 | -1.05032400 | H                         | 2.94886000  | 2.74703700  | 3.92616100  |
| H | -3.44688000 | 3.18967100  | 1.66670300  | C                         | -1.05539500 | 2.44709900  | 0.80366400  |
| H | -4.56160900 | 1.82150800  | 1.69317900  | H                         | -0.26891400 | 3.18414700  | 0.96114200  |
| H | -4.58376700 | 2.93609000  | 0.29680500  | O                         | -0.19876800 | -1.14006100 | -1.01754700 |
| C | 0.44763300  | 2.62540700  | -0.47134500 | O                         | -2.35984600 | -1.57838200 | -1.38376600 |
| H | -0.16296200 | 3.15191300  | 0.26111600  | C                         | -1.93096200 | -2.63380900 | -2.24176100 |
| O | 0.87685500  | -1.46480300 | -0.27613500 | H                         | -2.84181700 | -3.14694300 | -2.55804300 |
| O | 2.66109300  | -1.43336600 | -1.62502800 | H                         | -1.40898700 | -2.20111300 | -3.10205000 |
| C | 2.89623900  | -2.78466900 | -1.24016900 | H                         | -1.26330200 | -3.31737000 | -1.70723100 |
| H | 3.73404100  | -3.12643000 | -1.85260200 | O                         | -1.30103300 | 0.51439000  | -3.17043500 |
| H | 3.15644000  | -2.80565900 | -0.17643600 | C                         | -0.46973700 | 1.41671200  | -3.24580100 |
| H | 2.00726200  | -3.39832000 | -1.42024400 | O                         | 0.19548200  | 2.01004800  | -2.34308300 |
| O | 3.26651700  | -0.43017500 | 0.97682900  | C                         | -0.19748200 | 1.93442500  | -4.67777700 |
| C | 2.83192300  | 0.07943200  | 2.02170400  | F                         | 0.76073800  | 2.85725900  | -4.75422900 |
| O | 1.76286400  | 0.76420000  | 2.16548700  | F                         | 0.15454800  | 0.92302300  | -5.48291300 |
| C | 3.61797900  | -0.10777300 | 3.31594900  | F                         | -1.31438700 | 2.47536200  | -5.19052500 |
| H | 4.57364500  | -0.60814400 | 3.12525000  | <b>Sub5-TS2-PdOAc-OTf</b> |             |             |             |
| H | 3.02511700  | -0.70981700 | 4.01661800  |                           |             |             |             |
| H | 3.79109200  | 0.86261200  | 3.79744600  | Pd                        | 0.88719800  | 0.36887200  | -0.01782900 |

### Sub5-TS2-PdOAc-TFA

|    |             |            |             |   |             |            |             |
|----|-------------|------------|-------------|---|-------------|------------|-------------|
| Pd | 1.04404700  | 0.21790600 | 0.10025700  | C | -0.96570800 | 1.31066600 | 0.20756400  |
| C  | -0.77293700 | 1.31546700 | 0.03434500  | H | -0.33421100 | 1.76273100 | -0.95727000 |
| H  | -0.08299500 | 1.54444300 | -1.05995400 | O | 1.61078200  | 0.79928900 | 2.85036800  |
| O  | 1.50369400  | 0.87127700 | 2.99013300  | O | 1.91995000  | 1.84536300 | 0.87354000  |
| O  | 2.10649900  | 1.68366600 | 0.97095800  | C | 2.09899500  | 1.67324500 | 2.15126500  |
| C  | 2.13553100  | 1.62900900 | 2.27060900  | C | 3.03441000  | 2.72714500 | 2.72455000  |
| C  | 3.09521500  | 2.66112800 | 2.84478100  | C | -2.51702200 | 2.48417300 | 1.64727500  |
|    |             |            |             | C | -3.50796900 | 1.53890800 | 1.37968800  |
|    |             |            |             | C | -3.24384700 | 0.46879200 | 0.53235600  |

|   |             |             |             |
|---|-------------|-------------|-------------|
| C | -1.97919400 | 0.35862300  | -0.03604000 |
| O | 2.57998400  | -0.76847200 | 0.03865800  |
| C | 2.38108200  | -1.93772300 | 0.56222600  |
| O | 1.30923800  | -2.40789300 | 0.92529800  |
| C | 3.67589300  | -2.72242300 | 0.71429000  |
| H | -2.73451800 | 3.31581400  | 2.31731200  |
| H | -4.49157200 | 1.63816800  | 1.83706100  |
| H | -4.00271300 | -0.28283700 | 0.32172000  |
| C | -1.56480100 | -0.75217400 | -0.89780600 |
| H | 4.27814200  | -2.26981000 | 1.51210200  |
| H | 4.26898200  | -2.67759800 | -0.20661500 |
| H | 3.45839300  | -3.76322000 | 0.97534800  |
| H | 2.76740200  | 3.72618200  | 2.36086900  |
| H | 4.05790500  | 2.52258400  | 2.38671000  |
| H | 3.00361700  | 2.69971800  | 3.81832700  |
| C | -1.25752000 | 2.37233800  | 1.06760900  |
| H | -0.48360100 | 3.11302900  | 1.26615200  |
| O | -0.37537200 | -0.97702000 | -1.13983400 |
| O | -2.52845800 | -1.50881100 | -1.39261200 |
| C | -2.09464800 | -2.48859800 | -2.33449100 |
| H | -2.99964500 | -3.00302100 | -2.66441000 |
| H | -1.60212100 | -1.98930500 | -3.17639900 |
| H | -1.39487100 | -3.18800600 | -1.86547500 |
| C | 0.55148800  | 1.17391000  | -4.17054200 |
| S | -0.85626000 | 1.97647200  | -3.31040200 |
| O | -1.24892200 | 3.06858200  | -4.18481500 |
| O | -0.18751000 | 2.46830100  | -2.03613400 |
| O | -1.80468700 | 0.88878300  | -3.07622000 |
| F | 0.13147300  | 0.69494800  | -5.34077400 |
| F | 1.52121700  | 2.04939200  | -4.39551400 |
| F | 1.02998200  | 0.17057600  | -3.45200000 |

### Sub5-TS2-PdTFA-OAc

|    |             |             |             |
|----|-------------|-------------|-------------|
| Pd | 0.00950900  | 0.09515300  | 0.33166400  |
| C  | -1.49337400 | -1.29391800 | -0.33838200 |
| H  | -1.68958300 | -1.04416200 | 0.83184200  |
| O  | 2.25417700  | -1.28336300 | -1.21926200 |
| O  | 1.30877600  | -1.35595200 | 0.84506000  |
| C  | 2.11419700  | -1.71124800 | -0.09160800 |
| C  | 2.93380600  | -2.93558200 | 0.37172500  |
| C  | -1.66644100 | -3.14514500 | -1.88155900 |
| C  | -2.46186100 | -2.37341700 | -2.72755000 |
| C  | -2.76468500 | -1.05086500 | -2.40949000 |
| C  | -2.27442800 | -0.52048800 | -1.22575100 |
| O  | 1.46580500  | 1.49748200  | 0.64907800  |

|   |             |             |             |
|---|-------------|-------------|-------------|
| C | 1.67571800  | 2.24826500  | -0.36926200 |
| O | 1.13704200  | 2.27359700  | -1.45989200 |
| C | 2.79647900  | 3.26503600  | -0.05208300 |
| H | -1.42109200 | -4.16970400 | -2.15777100 |
| H | -2.83703300 | -2.80220800 | -3.65602800 |
| H | -3.35544600 | -0.43158500 | -3.08172100 |
| C | -2.40154300 | 0.89696500  | -0.85019100 |
| C | -1.17938500 | -2.60881400 | -0.69408600 |
| H | -0.54673400 | -3.19902600 | -0.03166800 |
| O | -1.54216100 | 1.44928800  | -0.14519000 |
| O | -3.37077300 | 1.57144500  | -1.42710200 |
| C | -3.55538600 | 2.89967900  | -0.93820500 |
| H | -4.39936100 | 3.30621800  | -1.49938200 |
| H | -3.78510800 | 2.84618300  | 0.13094200  |
| H | -2.65371200 | 3.49864600  | -1.10200700 |
| O | -3.91397200 | 0.39622200  | 1.02839800  |
| C | -3.48767100 | -0.15751700 | 2.06056500  |
| O | -2.43429100 | -0.86066700 | 2.17759200  |
| C | -4.27986800 | 0.00713600  | 3.35350600  |
| F | 3.08075300  | 4.03605800  | -1.10121900 |
| F | 2.43313300  | 4.07568300  | 0.95244000  |
| F | 3.92702100  | 2.65403200  | 0.31653700  |
| F | 3.88419300  | -3.25900600 | -0.50156400 |
| F | 3.51775900  | -2.74485600 | 1.55596200  |
| F | 2.11924600  | -3.99988400 | 0.49130100  |
| H | -5.22976600 | 0.52123500  | 3.17110500  |
| H | -3.68496300 | 0.58691400  | 4.07099200  |
| H | -4.46374600 | -0.97272000 | 3.81082300  |

### Sub5-TS2-PdTFA-TFA

|    |             |             |             |
|----|-------------|-------------|-------------|
| Pd | 1.08165200  | 0.19469400  | 0.09480700  |
| C  | -0.69695400 | 1.34098800  | 0.02784900  |
| H  | -0.03517200 | 1.54999700  | -1.04970700 |
| O  | 1.54073300  | 0.80095500  | 3.03894800  |
| O  | 2.12258400  | 1.65326300  | 1.01603500  |
| C  | 2.07715900  | 1.60139500  | 2.30026900  |
| C  | 2.78027500  | 2.84235500  | 2.89199300  |
| C  | -2.18561300 | 2.66731200  | 1.39278000  |
| C  | -3.21087200 | 1.74428700  | 1.18901500  |
| C  | -2.99430700 | 0.60186100  | 0.42230900  |
| C  | -1.74203500 | 0.40560500  | -0.14202900 |
| O  | 2.63512800  | -1.10176000 | 0.41400100  |
| C  | 2.27549800  | -2.17365800 | 1.01883200  |
| O  | 1.17589600  | -2.53859700 | 1.39248500  |
| C  | 3.49787100  | -3.09227700 | 1.24440700  |

|   |             |             |             |   |             |             |             |
|---|-------------|-------------|-------------|---|-------------|-------------|-------------|
| H | -2.36728200 | 3.54667000  | 2.00929300  | C | -1.52196800 | -0.71798700 | -0.88089500 |
| H | -4.18696100 | 1.91145600  | 1.64239000  | C | -1.13701900 | 2.42059200  | 1.05422600  |
| H | -3.78012800 | -0.13736100 | 0.27854600  | H | -0.34440600 | 3.14381200  | 1.24569100  |
| C | -1.35429400 | -0.80054500 | -0.88607900 | O | -0.32975800 | -0.96317900 | -1.11017600 |
| C | -0.93295300 | 2.46732000  | 0.82097000  | O | -2.48592600 | -1.46925400 | -1.36541700 |
| H | -0.12362400 | 3.17885300  | 0.98371500  | C | -2.06226300 | -2.45921700 | -2.30667400 |
| O | -0.16501700 | -1.13059300 | -0.99794200 | H | -2.97580400 | -2.94615000 | -2.65222400 |
| O | -2.33133700 | -1.54062600 | -1.35846700 | H | -1.54249500 | -1.96759500 | -3.13651700 |
| C | -1.92380900 | -2.61415600 | -2.20951300 | H | -1.39055700 | -3.17803900 | -1.82674800 |
| H | -2.84529600 | -3.11390100 | -2.51414800 | C | 0.50484300  | 1.03665300  | -4.22101600 |
| H | -1.40098200 | -2.19570600 | -3.07583700 | S | -0.83548600 | 1.92191500  | -3.33489900 |
| H | -1.26549100 | -3.30211400 | -1.66973800 | O | -1.23024800 | 2.99388900  | -4.23193400 |
| O | -1.28703600 | 0.49423000  | -3.12814900 | O | -0.10249700 | 2.42470400  | -2.10415800 |
| C | -0.43238500 | 1.37174200  | -3.25381100 | O | -1.81066100 | 0.87450400  | -3.02534800 |
| O | 0.26811400  | 1.97082200  | -2.38484600 | F | 0.01820200  | 0.52554700  | -5.35006600 |
| C | -0.18364000 | 1.83369400  | -4.70855300 | F | 1.49419600  | 1.86496900  | -4.51980700 |
| F | 0.79643900  | 2.72589400  | -4.83673200 | F | 0.97747900  | 0.04422200  | -3.48019000 |
| F | 0.12043600  | 0.78599700  | -5.48554000 | F | 3.48675700  | -4.01229000 | 1.15862200  |
| F | -1.29874400 | 2.38729300  | -5.20992700 | F | 4.11786700  | -3.05744600 | -0.66605800 |
| F | 3.17230800  | -4.19925200 | 1.91091900  | F | 4.65024000  | -2.20211300 | 1.24252600  |
| F | 4.02921600  | -3.47213800 | 0.07350600  | F | 2.98574500  | 2.68238700  | 4.12137700  |
| F | 4.45829800  | -2.47219600 | 1.93721900  | F | 3.89136400  | 3.17923900  | 2.23308100  |
| F | 2.88554800  | 2.77032200  | 4.21603900  | F | 1.92855300  | 3.93658700  | 2.72156900  |
| F | 4.00439900  | 3.02399700  | 2.39496500  |   |             |             |             |
| F | 2.06090600  | 3.94246100  | 2.60478400  |   |             |             |             |

### Sub5-TS2-PdTFA-OTf

|    |             |             |             |
|----|-------------|-------------|-------------|
| Pd | 0.93651100  | 0.35612900  | -0.02624600 |
| C  | -0.88721400 | 1.35319800  | 0.18793800  |
| H  | -0.28733000 | 1.76327500  | -0.95668500 |
| O  | 1.64866800  | 0.73885900  | 2.89296500  |
| O  | 1.96160100  | 1.81255600  | 0.91722700  |
| C  | 2.05486600  | 1.64057800  | 2.18879400  |
| C  | 2.73915000  | 2.86829600  | 2.82777300  |
| C  | -2.38572700 | 2.55409800  | 1.65370000  |
| C  | -3.39536500 | 1.62500100  | 1.40336400  |
| C  | -3.16636100 | 0.54323700  | 0.55811400  |
| C  | -1.91595600 | 0.40993600  | -0.03117000 |
| O  | 2.60332700  | -0.84039800 | 0.02322300  |
| C  | 2.37697100  | -1.98703400 | 0.54909600  |
| O  | 1.34359300  | -2.46660500 | 0.97988800  |
| C  | 3.67341300  | -2.82750000 | 0.57789000  |
| H  | -2.57741000 | 3.38909400  | 2.32635200  |
| H  | -4.36889800 | 1.74278200  | 1.87693100  |
| H  | -3.94068700 | -0.19774300 | 0.36829100  |

### Sub5-TS2-PdOTf-OAc

|    |             |             |             |
|----|-------------|-------------|-------------|
| Pd | 0.13119300  | 0.49815400  | 0.12259200  |
| C  | -1.57335800 | 1.70540600  | 0.63022500  |
| C  | -2.66030400 | 1.99287200  | 2.77253000  |
| C  | -3.65417700 | 1.09149000  | 2.39003100  |
| C  | -3.62116900 | 0.46649300  | 1.14365100  |
| C  | -2.58531400 | 0.77275700  | 0.27769000  |
| H  | -2.68652000 | 2.44180100  | 3.76355200  |
| H  | -4.45696700 | 0.85140300  | 3.08595000  |
| H  | -4.37044500 | -0.27016000 | 0.86165800  |
| C  | -2.32810600 | 0.05449300  | -0.98093700 |
| C  | -1.62376700 | 2.29898700  | 1.90074800  |
| H  | -0.83365700 | 2.98485600  | 2.20056100  |
| O  | -1.15161500 | -0.08741600 | -1.37588500 |
| O  | -3.32346200 | -0.59469400 | -1.52231100 |
| C  | -2.99684900 | -1.30333800 | -2.72373200 |
| H  | -2.20016900 | -2.02766100 | -2.52447300 |
| H  | -3.91881900 | -1.80126800 | -3.02906900 |
| H  | -1.13881900 | 2.31290600  | -0.28383700 |
| S  | 1.14907200  | 0.69109200  | 3.00559400  |

|   |             |             |             |
|---|-------------|-------------|-------------|
| O | 1.32518800  | 1.26202400  | 1.59921600  |
| O | 0.30402900  | -0.49375600 | 3.03943000  |
| C | 2.85998900  | 0.10397800  | 3.31990900  |
| F | 3.23212500  | -0.77028100 | 2.40301800  |
| F | 2.90914100  | -0.47448400 | 4.51660000  |
| F | 3.70408100  | 1.12844000  | 3.30920100  |
| O | 0.92880300  | 1.74461600  | 3.98916800  |
| S | 1.13692100  | -2.37166100 | -0.63392200 |
| O | 1.73556900  | -2.88714100 | -1.85747500 |
| O | -0.28292300 | -2.61579500 | -0.39429100 |
| C | 1.98667100  | -3.28292500 | 0.71423300  |
| F | 1.78680900  | -4.59007900 | 0.54716300  |
| F | 1.50777500  | -2.93091000 | 1.89458100  |
| F | 3.29364700  | -3.05167000 | 0.68695300  |
| O | 1.58119800  | -0.94816000 | -0.33287600 |
| C | -2.00509500 | 3.75581700  | -3.68616000 |
| C | -1.94995600 | 2.87830100  | -2.44039900 |
| O | -1.02147900 | 3.16811800  | -1.62680400 |
| O | -2.79527100 | 1.96363000  | -2.32769900 |
| H | -1.10656600 | 3.58039300  | -4.29166100 |
| H | -1.99630100 | 4.81497000  | -3.40158900 |
| H | -2.89427500 | 3.53428400  | -4.28602100 |

## Sub5-TS2-PdOTf-TFA

|    |             |             |             |
|----|-------------|-------------|-------------|
| Pd | 0.07457400  | 0.38036500  | 0.11902800  |
| C  | -1.62321900 | 1.49964600  | 0.69981000  |
| C  | -2.86765000 | 2.05853000  | 2.69374100  |
| C  | -3.92862900 | 1.26369600  | 2.26202200  |
| C  | -3.85310100 | 0.55834100  | 1.06146000  |
| C  | -2.70446500 | 0.67498900  | 0.29717100  |
| H  | -2.93703700 | 2.58318900  | 3.64481300  |
| H  | -4.82316400 | 1.17944000  | 2.87736000  |
| H  | -4.66457900 | -0.08855600 | 0.73433200  |
| C  | -2.44057400 | -0.09751500 | -0.92281700 |
| C  | -1.71472800 | 2.17345500  | 1.92405400  |
| H  | -0.87801100 | 2.78107000  | 2.26506200  |
| O  | -1.27230500 | -0.27118100 | -1.31415600 |
| O  | -3.45773700 | -0.66665500 | -1.51171400 |
| C  | -3.13984200 | -1.38676100 | -2.71097400 |
| H  | -2.39330100 | -2.15829700 | -2.49650300 |
| H  | -4.08105800 | -1.82577600 | -3.04528200 |
| H  | -2.75100600 | -0.68098200 | -3.45182200 |
| H  | -1.12393200 | 2.13466400  | -0.24341200 |
| S  | 1.26845400  | 0.71695600  | 2.92643300  |
| O  | 1.30886800  | 1.25276400  | 1.49465300  |

|   |             |             |             |
|---|-------------|-------------|-------------|
| O | 0.48184000  | -0.50066900 | 3.05604300  |
| C | 3.02265000  | 0.21401300  | 3.12784900  |
| F | 3.36047000  | -0.68267600 | 2.21979200  |
| F | 3.18658300  | -0.31080200 | 4.33866000  |
| F | 3.81679700  | 1.27050700  | 3.01132200  |
| O | 1.07459700  | 1.79304100  | 3.89027800  |
| S | 1.13563700  | -2.46675200 | -0.59933300 |
| O | 1.67323800  | -2.99858000 | -1.84346700 |
| O | -0.25954500 | -2.74028600 | -0.26590100 |
| C | 2.09827700  | -3.30836400 | 0.71776500  |
| F | 1.93186700  | -4.62527200 | 0.60139500  |
| F | 1.68358800  | -2.93436400 | 1.91523900  |
| F | 3.39170800  | -3.03544200 | 0.59910100  |
| O | 1.54916800  | -1.02067600 | -0.36487400 |
| C | -1.72223700 | 3.88871200  | -3.43259800 |
| C | -1.82050900 | 2.84314900  | -2.29658600 |
| O | -0.95086600 | 3.04418700  | -1.39758900 |
| O | -2.70000100 | 1.98492100  | -2.38118800 |
| F | -2.58117300 | 3.64849100  | -4.42432200 |
| F | -0.49472900 | 3.91723000  | -3.96162900 |
| F | -1.98545600 | 5.11709700  | -2.96353000 |

## Sub5-TS2-PdOTf-OTf

|    |             |             |             |
|----|-------------|-------------|-------------|
| Pd | 0.11574400  | 0.43729800  | 0.24275900  |
| C  | -1.64206500 | 1.40495800  | 0.79233400  |
| C  | -3.12772700 | 1.98202100  | 2.60487600  |
| C  | -4.16539600 | 1.28437900  | 1.98811000  |
| C  | -3.95912600 | 0.61924000  | 0.78114200  |
| C  | -2.70193000 | 0.67388500  | 0.20057300  |
| H  | -3.30333200 | 2.48071800  | 3.55642400  |
| H  | -5.14637800 | 1.24971400  | 2.45931900  |
| H  | -4.75635800 | 0.05191300  | 0.30503600  |
| C  | -2.31811500 | -0.04766200 | -1.01507200 |
| C  | -1.86631400 | 2.03836300  | 2.01952100  |
| H  | -1.05054800 | 2.57622700  | 2.50098600  |
| O  | -1.11937600 | -0.20632400 | -1.30044600 |
| O  | -3.27011600 | -0.54914500 | -1.75751300 |
| C  | -2.82268000 | -1.17558000 | -2.96925600 |
| H  | -2.13616100 | -1.99574400 | -2.73557200 |
| H  | -3.72648400 | -1.53961400 | -3.45969800 |
| H  | -2.31284600 | -0.42824200 | -3.58672600 |
| H  | -1.03084700 | 2.19331200  | -0.06289900 |
| S  | 1.21795600  | 0.61939300  | 3.09185400  |
| O  | 1.20057400  | 1.31965800  | 1.73025600  |
| O  | 0.51720400  | -0.65586900 | 3.08008700  |



|   |             |             |             |
|---|-------------|-------------|-------------|
| C | 3.00568700  | 0.21934400  | 3.22555500  |
| F | 3.39971000  | -0.51489400 | 2.20243100  |
| F | 3.21616800  | -0.45345300 | 4.35273100  |
| F | 3.71959900  | 1.33756600  | 3.25750700  |
| O | 0.96063900  | 1.56575900  | 4.16908700  |
| S | 1.33781800  | -2.30231000 | -0.55378400 |
| O | 1.85947500  | -2.71895300 | -1.84807600 |
| O | -0.03587800 | -2.65730300 | -0.20786400 |
| C | 2.37371800  | -3.19654200 | 0.67035100  |
| F | 2.25936800  | -4.50674600 | 0.45735800  |
| F | 1.98192100  | -2.93401400 | 1.90468700  |
| F | 3.65039900  | -2.85809500 | 0.53755600  |
| O | 1.69410900  | -0.86180600 | -0.21621600 |
| C | -0.11610700 | 2.76677700  | -3.36825400 |
| S | -1.46512000 | 3.28452100  | -2.23812600 |
| O | -1.81804200 | 4.62681900  | -2.66636800 |
| O | -0.75976100 | 3.25491400  | -0.89638200 |
| O | -2.47106000 | 2.22643100  | -2.37022600 |
| F | -0.58483100 | 2.70843400  | -4.61216200 |
| F | 0.88223000  | 3.63657700  | -3.32797400 |
| F | 0.33873700  | 1.56850900  | -3.03137600 |

## Sub6

|   |             |             |             |
|---|-------------|-------------|-------------|
| C | -3.59515700 | 0.92467300  | 0.26830400  |
| C | -3.10624500 | 0.76602200  | -1.02715000 |
| C | -2.12146200 | -0.17763600 | -1.28489200 |
| C | -1.61369100 | -0.96951800 | -0.25335700 |
| C | -2.10835000 | -0.80840400 | 1.03831900  |
| C | -3.09730600 | 0.13603000  | 1.29905100  |
| H | -4.36520700 | 1.66678600  | 0.47246300  |
| H | -3.49484200 | 1.38197800  | -1.83647800 |
| H | -1.72332500 | -0.29504800 | -2.29390600 |
| H | -1.69720300 | -1.41170200 | 1.84762600  |
| H | -3.47318100 | 0.26014900  | 2.31313400  |
| C | -0.51761200 | -1.95641300 | -0.53696100 |
| H | -0.78535500 | -2.59747600 | -1.38720400 |
| H | -0.34718800 | -2.60873400 | 0.33067100  |
| N | 0.73456000  | -1.29022300 | -0.94539000 |
| H | 1.30838000  | -1.77563600 | -1.63067900 |
| S | 1.71574400  | -0.61430400 | 0.20560400  |
| C | 1.39548900  | 1.18759100  | -0.02219300 |
| O | 3.08862300  | -0.81379100 | -0.21771100 |
| O | 1.23323500  | -0.93687000 | 1.53428000  |
| F | 1.66684200  | 1.52925300  | -1.26946800 |
| F | 2.19394100  | 1.84375900  | 0.80191600  |

|   |            |            |            |
|---|------------|------------|------------|
| F | 0.13868600 | 1.47491400 | 0.25568000 |
|---|------------|------------|------------|

## Sub7

|   |             |             |             |
|---|-------------|-------------|-------------|
| C | -3.53501000 | -1.15861200 | -0.00002000 |
| C | -2.15721600 | -1.32022000 | -0.00014000 |
| C | -1.31007600 | -0.20682900 | -0.00010300 |
| C | -1.86154200 | 1.07792300  | 0.00003500  |
| C | -3.24486000 | 1.22257000  | 0.00014600  |
| C | -4.08938200 | 0.11772300  | 0.00012100  |
| H | -4.17729500 | -2.03784900 | -0.00004600 |
| H | -1.72740000 | -2.32350400 | -0.00027100 |
| H | -1.20374400 | 1.93935800  | 0.00002300  |
| H | -3.66580900 | 2.22700300  | 0.00025200  |
| H | -5.16975800 | 0.24891800  | 0.00020300  |
| N | 0.07542200  | -0.46161600 | -0.00019000 |
| H | 0.32093900  | -1.44239500 | 0.00008800  |
| C | 1.11283100  | 0.43675400  | -0.00022500 |
| O | 0.95446500  | 1.64631800  | -0.00039100 |
| C | 2.53149900  | -0.15519800 | 0.00006300  |
| C | 2.60019100  | -1.67978000 | -0.00046300 |
| H | 2.13725900  | -2.11936000 | 0.89571300  |
| H | 2.13752000  | -2.11869400 | -0.89710500 |
| H | 3.65159300  | -1.99713200 | -0.00040200 |
| C | 3.23251500  | 0.38250100  | -1.24954000 |
| H | 3.18886600  | 1.47702300  | -1.27324000 |
| H | 4.28621700  | 0.07039600  | -1.25436400 |
| H | 2.76131900  | 0.00086100  | -2.16644000 |
| C | 3.23163300  | 0.38166600  | 1.25051800  |
| H | 4.28529800  | 0.06943600  | 1.25600500  |
| H | 3.18812800  | 1.47618200  | 1.27485000  |
| H | 2.75969200  | -0.00045400 | 2.16684400  |

## DMSO

|   |             |             |             |
|---|-------------|-------------|-------------|
| S | 0.00000400  | 0.24723900  | -0.44680600 |
| O | -0.00087000 | 1.48522100  | 0.39606500  |
| C | -1.34064400 | -0.81587300 | 0.17977700  |
| H | -2.28841000 | -0.32212900 | -0.05606900 |
| H | -1.30498800 | -1.80045800 | -0.30094600 |
| H | -1.24014200 | -0.90681200 | 1.26811200  |
| C | 1.34134600  | -0.81454400 | 0.17986800  |
| H | 1.24044200  | -0.90657400 | 1.26809400  |
| H | 1.30665400  | -1.79877200 | -0.30169700 |
| H | 2.28913600  | -0.32034900 | -0.05499300 |

## NMP

|   |            |             |             |
|---|------------|-------------|-------------|
| C | 1.77578900 | 0.51518100  | -0.19832300 |
| C | 1.32796500 | -0.90280800 | 0.14316100  |

|   |             |             |             |   |             |             |             |
|---|-------------|-------------|-------------|---|-------------|-------------|-------------|
| C | -0.18377000 | -0.87089000 | -0.00562900 | F | -0.75918100 | -3.35247100 | -2.04070700 |
| C | 0.54841700  | 1.37103500  | 0.13051300  | F | -3.19403400 | -1.92531800 | -2.23118100 |
| H | 2.66872500  | 0.84037000  | 0.34591600  | F | -5.02560500 | -1.12070400 | -1.42113300 |
| H | 1.99494000  | 0.59040700  | -1.27136100 | F | -4.35866900 | -3.09041300 | -0.83782900 |
| H | 1.55220800  | -1.16745800 | 1.18701000  | F | -1.52744300 | 4.05532800  | 4.02849800  |
| H | 1.76153300  | -1.68575300 | -0.48720700 | F | 0.15396700  | 3.15164900  | 3.02331000  |
| H | 0.44291000  | 2.24090900  | -0.53406400 | F | -0.74916200 | 4.93735700  | 2.21673000  |
| H | 0.57128200  | 1.75149000  | 1.16794600  | S | -3.03359800 | -1.14403900 | 0.25475300  |
| O | -0.94166400 | -1.81977100 | -0.04800300 | S | -2.15795100 | 2.75549800  | 1.86682900  |
| C | -1.92423500 | 0.87317600  | -0.01120500 | O | -1.84553400 | -2.02913300 | 0.37069600  |
| H | -2.14716300 | 1.57010000  | -0.83122600 | O | -2.09683100 | 1.44172700  | 2.48545900  |
| H | -2.55123200 | -0.01846900 | -0.11231200 | C | 0.53027100  | 2.22934700  | -3.49486700 |
| H | -2.15978800 | 1.37215100  | 0.94152000  | C | 1.13128700  | 1.81638400  | -4.81036800 |
| N | -0.55215700 | 0.45003600  | -0.05332800 | C | 0.02809000  | 2.09816300  | -5.82786100 |

## Sub6-intermolecular

|    |             |             |             |                            |             |             |             |
|----|-------------|-------------|-------------|----------------------------|-------------|-------------|-------------|
| C  | 3.70338100  | 2.07607200  | 1.36556500  | H                          | 1.38322500  | 0.74922000  | -4.72848700 |
| C  | 3.32181600  | 0.77862700  | 1.02374500  | H                          | 2.07151500  | 2.34998800  | -4.98593100 |
| C  | 2.09928900  | 0.55788900  | 0.40891300  | H                          | 0.16932600  | 3.09000500  | -6.27507500 |
| C  | 1.25044800  | 1.65534800  | 0.10770400  | H                          | -0.00827300 | 1.36841900  | -6.64214500 |
| C  | 1.63329800  | 2.94640300  | 0.51750600  | H                          | -2.00170500 | 2.81257500  | -5.31760900 |
| C  | 2.86347300  | 3.15975300  | 1.12034800  | H                          | -1.72116500 | 1.09694000  | -4.93431700 |
| H  | 4.66868100  | 2.23891600  | 1.84206200  | O                          | 1.20109700  | 2.32971600  | -2.44012500 |
| H  | 3.97815900  | -0.06060200 | 1.25468600  | N                          | -0.77240100 | 2.45393400  | -3.65096200 |
| H  | 0.97931600  | 1.89622400  | -1.17657400 | C                          | -1.70718000 | 2.81473900  | -2.60747700 |
| H  | 0.95846800  | 3.77845100  | 0.31727200  | H                          | -2.27657500 | 1.93884700  | -2.26570100 |
| H  | 3.16461800  | 4.16377900  | 1.41089200  | H                          | -1.17128600 | 3.24798700  | -1.75853600 |
| N  | 0.33421500  | -0.82661400 | -0.61076400 | H                          | -2.40789400 | 3.56211200  | -2.99853700 |
| Pd | -0.67249600 | 0.98282000  | -0.10337600 | <b>Sub6-intramolecular</b> |             |             |             |
| O  | -2.66023200 | 0.19782800  | -0.32740100 | C                          | 3.99266400  | 1.46142900  | 0.89938200  |
| O  | -3.38893000 | 3.51651500  | 1.81631500  | C                          | 3.60516400  | 0.20231200  | 0.44595200  |
| O  | -1.44029800 | 2.77755300  | 0.49791700  | C                          | 2.27322900  | -0.06142200 | 0.16123600  |
| C  | -0.99783900 | 3.79422800  | 2.84676200  | C                          | 1.30631900  | 0.97320900  | 0.28794700  |
| C  | -3.96743900 | -1.86578700 | -1.15208000 | C                          | 1.71200200  | 2.20887200  | 0.83552000  |
| O  | -3.95368700 | -1.12599900 | 1.36737700  | C                          | 3.04689700  | 2.46004900  | 1.11425500  |
| H  | -0.41968400 | -1.47087800 | -0.23068900 | H                          | 5.04257300  | 1.65369800  | 1.11285600  |
| C  | 1.60925600  | -0.83942700 | 0.16876800  | H                          | 4.34663900  | -0.59053200 | 0.34508500  |
| H  | 2.36640500  | -1.47002900 | -0.31339200 | H                          | 0.53800900  | 1.44372900  | -0.70380300 |
| H  | 1.34748900  | -1.30862900 | 1.12785200  | H                          | 0.96805100  | 2.98743800  | 0.98621800  |
| S  | 0.50243600  | -1.07872300 | -2.29700000 | H                          | 3.34913600  | 3.43034700  | 1.50159200  |
| O  | 1.84591900  | -0.69227200 | -2.67752300 | N                          | 0.36702800  | -1.55723300 | -0.25981100 |
| O  | -0.67350700 | -0.56410300 | -2.96323300 | Pd                         | -0.57023800 | 0.14549600  | 0.56036600  |
| C  | 0.42391300  | -2.92985300 | -2.41199400 | O                          | -2.37844100 | -0.78093500 | 1.10335100  |
| F  | 1.35736700  | -3.44071600 | -1.62420200 | O                          | -0.27231900 | 2.27907700  | -1.45022000 |
| F  | 0.66329200  | -3.25496200 | -3.66511500 | O                          | -1.44764300 | 2.08361000  | 0.70789400  |

|                            |             |             |             |                              |             |             |             |
|----------------------------|-------------|-------------|-------------|------------------------------|-------------|-------------|-------------|
| C                          | -1.52493800 | 4.39044200  | -0.49163300 | O                            | 1.21688900  | 1.90533200  | 2.00892000  |
| C                          | -3.79223900 | -2.93136300 | 0.79780600  | C                            | 2.94879200  | -0.82401600 | 0.13406800  |
| O                          | -2.81403200 | -2.16607700 | 3.12966200  | O                            | 2.48409400  | 0.12199200  | -0.60275300 |
| H                          | -0.10258000 | -2.30646000 | 0.31410400  | C                            | 4.47950200  | -0.93183500 | -0.03477500 |
| C                          | 1.84583500  | -1.47101000 | -0.11122500 | C                            | 1.07789800  | 4.14383100  | 1.14342900  |
| H                          | 2.35596500  | -1.89717300 | -0.98378900 | O                            | 2.36017100  | -1.59878000 | 0.86469600  |
| H                          | 2.09586200  | -2.10082400 | 0.75375900  | F                            | -0.15380400 | 4.64492700  | 0.91708400  |
| S                          | -0.19325300 | -1.63894400 | -1.91349800 | F                            | 1.47600100  | 4.55823400  | 2.33252500  |
| O                          | 0.83753600  | -1.03549400 | -2.72845400 | F                            | 1.88755000  | 4.66577300  | 0.21805200  |
| O                          | -1.58007200 | -1.25284700 | -1.93603200 | F                            | 4.77488800  | -1.28410500 | -1.29567100 |
| C                          | -0.13443200 | -3.47442500 | -2.18921200 | F                            | 5.00337000  | -1.84510700 | 0.77339200  |
| F                          | 1.09099100  | -3.90659300 | -1.92767300 | F                            | 5.08242400  | 0.23313000  | 0.20944000  |
| F                          | -0.43496900 | -3.70031100 | -3.44728000 | C                            | -1.84989500 | -4.54413100 | -1.94571200 |
| F                          | -0.99455000 | -4.05880000 | -1.38899900 | H                            | -1.61804100 | -5.54662800 | -2.32676700 |
| F                          | -3.47991300 | -2.98151300 | -0.48792400 | H                            | -2.42991300 | -4.69540200 | -1.02264800 |
| F                          | -4.89885800 | -2.23233200 | 0.95905200  | H                            | -2.48401400 | -4.05047400 | -2.69632300 |
| F                          | -3.97446000 | -4.16261600 | 1.24864000  | C                            | 0.27510100  | -3.76210000 | -2.99412300 |
| F                          | -1.57260500 | 4.96660900  | -1.67528600 | H                            | -0.27148400 | -3.26019500 | -3.80458300 |
| F                          | -2.56147700 | 4.75439400  | 0.23306300  | H                            | 1.22650900  | -3.24172300 | -2.84348400 |
| F                          | -0.40492900 | 4.74158800  | 0.12492400  | H                            | 0.48796200  | -4.79048900 | -3.31401200 |
| S                          | -2.41881400 | -2.15588600 | 1.73770100  | C                            | 0.25718200  | -4.48361100 | -0.59010100 |
| S                          | -1.56816600 | 2.56401900  | -0.72231200 | H                            | 1.18521700  | -3.94073000 | -0.37380000 |
| O                          | -1.23514100 | -2.96668300 | 1.36723100  | H                            | -0.32340600 | -4.54062000 | 0.34123000  |
| O                          | -2.78087000 | 2.24801200  | -1.43397800 | H                            | 0.50433900  | -5.50766700 | -0.90087000 |
| <b>Sub7-intermolecular</b> |             |             |             | S                            | -0.60361200 | 2.06372300  | -3.61045900 |
| C                          | -3.38138700 | 1.51377400  | 1.05006900  | C                            | -0.81121200 | 3.55800300  | -2.61851100 |
| C                          | -4.09378000 | 0.31802700  | 1.09315500  | H                            | -0.31156500 | 4.37968400  | -3.14489100 |
| C                          | -3.59754000 | -0.81267600 | 0.46133100  | H                            | -1.88533600 | 3.76002800  | -2.55694300 |
| C                          | -2.37910700 | -0.75952400 | -0.21635400 | H                            | -0.37007900 | 3.41719200  | -1.62181000 |
| C                          | -1.64290200 | 0.43917700  | -0.29497200 | C                            | 1.17084800  | 1.81617500  | -3.34837500 |
| C                          | -2.17741000 | 1.56234300  | 0.36493600  | H                            | 1.68998200  | 2.50147200  | -4.02964700 |
| H                          | -3.76244400 | 2.39976900  | 1.55327700  | H                            | 1.46083700  | 2.00428100  | -2.30812400 |
| H                          | -5.04041700 | 0.26014500  | 1.62718400  | H                            | 1.40240100  | 0.78097900  | -3.62055400 |
| H                          | -4.15097600 | -1.75143500 | 0.51069000  | O                            | -1.37736700 | 0.93675300  | -2.87678600 |
| H                          | -1.27500100 | 0.74787800  | -1.57181900 | <b>Sub7-intermolecular-2</b> |             |             |             |
| H                          | -1.62067500 | 2.49786400  | 0.32536400  | C                            | 1.68679800  | -0.12399600 | 4.24670200  |
| N                          | -1.96405100 | -1.96653200 | -0.82531300 | C                            | 2.25268100  | 1.15420700  | 4.31575500  |
| H                          | -2.68400100 | -2.67691700 | -0.88020300 | C                            | 2.31314800  | 1.96512200  | 3.18355200  |
| C                          | -0.73597000 | -2.35618300 | -1.22811600 | C                            | 1.79188900  | 1.49707600  | 1.97517600  |
| O                          | 0.27472300  | -1.64099000 | -1.18166000 | C                            | 1.21948700  | 0.20580000  | 1.86710700  |
| C                          | -0.54471700 | -3.79159600 | -1.70261400 | C                            | 1.17989400  | -0.58506400 | 3.03738200  |
| Pd                         | 0.44195600  | 0.28614300  | -0.50494800 | H                            | 1.64914600  | -0.75055000 | 5.13284300  |
| C                          | 1.01873200  | 2.60612400  | 1.04480100  | H                            | 2.64896300  | 1.52486100  | 5.25700200  |
| O                          | 0.67464800  | 2.27412500  | -0.15916400 | H                            | 2.74819300  | 2.95983400  | 3.24372600  |

|    |             |             |             |
|----|-------------|-------------|-------------|
| H  | 1.60584400  | -0.34818000 | 0.81691100  |
| H  | 0.74886300  | -1.57719000 | 2.96315100  |
| C  | 1.14257000  | 2.38778300  | -0.25296600 |
| O  | 0.04472700  | 1.79109000  | -0.34139700 |
| Pd | -0.53027700 | 0.09375300  | 0.62896600  |
| N  | 1.94031100  | 2.31971700  | 0.83228500  |
| H  | 2.75746800  | 2.91490800  | 0.82290600  |
| C  | 1.57721200  | 3.24553900  | -1.44795400 |
| C  | 1.69082900  | 2.27513400  | -2.65149500 |
| H  | 0.71671100  | 1.83516500  | -2.88002700 |
| H  | 2.03939500  | 2.82794900  | -3.53084100 |
| H  | 2.39011600  | 1.45703600  | -2.44998600 |
| C  | 0.46879200  | 4.28962600  | -1.71130000 |
| H  | 0.38580300  | 5.00267800  | -0.88254600 |
| H  | 0.70535300  | 4.85208000  | -2.62100900 |
| H  | -0.50075700 | 3.80355100  | -1.84324900 |
| C  | 2.92445000  | 3.95792600  | -1.22912600 |
| H  | 2.89266700  | 4.66498200  | -0.38918500 |
| H  | 3.74789900  | 3.24932400  | -1.07697300 |
| H  | 3.16823100  | 4.54303700  | -2.12128700 |
| C  | -4.47427000 | 0.71327400  | -0.92773500 |
| C  | -3.18586000 | 0.90292100  | -0.08357100 |
| O  | -2.27806000 | 0.04963200  | -0.45137500 |
| O  | -3.13723500 | 1.75427100  | 0.78525000  |
| F  | -5.43804300 | 1.56563400  | -0.56218200 |
| F  | -4.95261700 | -0.54500900 | -0.78182400 |
| F  | -4.22504200 | 0.90233200  | -2.24114900 |
| C  | 3.07722500  | -2.15534900 | -2.05607600 |
| C  | 2.28398500  | -1.85163800 | -0.75254200 |
| O  | 2.43375400  | -0.64984700 | -0.35317300 |
| O  | 1.62896800  | -2.77099800 | -0.25124500 |
| F  | 2.59789000  | -3.24045700 | -2.68832700 |
| F  | 4.37815200  | -2.38332300 | -1.77283900 |
| F  | 3.02743900  | -1.12325000 | -2.92893500 |
| S  | -1.91393700 | -2.78084800 | 0.69207600  |
| O  | -1.06349300 | -1.70198400 | 1.47326000  |
| C  | -1.43443900 | -2.80069100 | -1.06679700 |
| H  | -1.94047000 | -3.66503100 | -1.51035500 |
| H  | -1.81185700 | -1.87582200 | -1.50322900 |
| H  | -0.34714400 | -2.88662000 | -1.14171400 |
| C  | -1.02882000 | -4.28735100 | 1.19861800  |
| H  | -1.47165800 | -5.14748200 | 0.68792100  |
| H  | 0.02376700  | -4.15504800 | 0.93421400  |
| H  | -1.15572200 | -4.38913800 | 2.27845000  |

### Sub7-intermolecular-3

|    |             |             |             |
|----|-------------|-------------|-------------|
| C  | 1.27909900  | -3.93936100 | -0.99404300 |
| C  | 0.35142300  | -4.17325600 | -2.01135000 |
| C  | -0.70835800 | -3.30358200 | -2.22148600 |
| C  | -0.85584900 | -2.17642000 | -1.41275900 |
| C  | 0.04981600  | -1.92636500 | -0.35161300 |
| C  | 1.12882000  | -2.82787100 | -0.18733100 |
| H  | 2.10874600  | -4.62528700 | -0.83927700 |
| H  | 0.45935500  | -5.04305100 | -2.65733600 |
| H  | -1.41588000 | -3.48468200 | -3.03076000 |
| H  | -0.49478500 | -1.65613400 | 0.73130100  |
| H  | 1.84089200  | -2.62612500 | 0.61081800  |
| C  | -2.21865800 | -0.10214700 | -1.26195000 |
| O  | -1.34287700 | 0.65328900  | -0.79567400 |
| Pd | 0.48426200  | 0.10883600  | -0.02744700 |
| N  | -1.97163900 | -1.36604500 | -1.66976600 |
| H  | -2.77638200 | -1.86250600 | -2.03484700 |
| C  | -3.58203100 | 0.49632800  | -1.58845800 |
| C  | -3.98151900 | 1.47307300  | -0.48223000 |
| H  | -3.20224200 | 2.22218200  | -0.30420800 |
| H  | -4.90331100 | 1.99129300  | -0.77882400 |
| H  | -4.16147800 | 0.93657600  | 0.45593200  |
| C  | -3.39614600 | 1.25248500  | -2.91276800 |
| H  | -3.09257600 | 0.57900500  | -3.72718600 |
| H  | -4.34503900 | 1.72470800  | -3.20010700 |
| H  | -2.63637600 | 2.03894200  | -2.81710700 |
| C  | -4.67738600 | -0.55678500 | -1.74269000 |
| H  | -4.54553700 | -1.18626900 | -2.63717000 |
| H  | -4.74123500 | -1.18670500 | -0.84710100 |
| H  | -5.64180200 | -0.04917600 | -1.87252800 |
| C  | 4.60393500  | -0.51591700 | 0.70050100  |
| C  | 3.30804100  | 0.06473300  | 0.09575000  |
| O  | 2.29143800  | -0.37210700 | 0.73909600  |
| O  | 3.36535400  | 0.80818800  | -0.87315000 |
| F  | 5.68042500  | -0.10364800 | 0.04338900  |
| F  | 4.56948100  | -1.85356100 | 0.64299600  |
| F  | 4.73480100  | -0.16327700 | 1.97865800  |
| C  | -2.73953200 | 0.12064000  | 2.90589700  |
| C  | -2.28716700 | -0.92168700 | 1.86304400  |
| O  | -1.08951500 | -1.29631600 | 2.02578400  |
| O  | -3.07328400 | -1.18788800 | 0.95044300  |
| F  | -4.06879200 | 0.21119400  | 2.98718600  |
| F  | -2.28108900 | 1.31941400  | 2.50290000  |
| F  | -2.26789600 | -0.11064500 | 4.12568200  |

|   |             |            |             |   |             |             |             |
|---|-------------|------------|-------------|---|-------------|-------------|-------------|
| S | 1.25904900  | 2.85325700 | -1.13350300 | H | 1.13206900  | -4.21134000 | -0.15948300 |
| O | 0.91700000  | 2.16782000 | 0.20850000  | H | -0.46235500 | -4.99430600 | -0.03353700 |
| C | 0.07340000  | 4.21648300 | -1.15112000 | C | 0.76890000  | -2.92745000 | -2.54562800 |
| H | 0.27185100  | 4.88309100 | -1.99789700 | H | 1.61681600  | -2.54083200 | -1.96600900 |
| H | -0.91775600 | 3.76180300 | -1.24900400 | H | 1.12885700  | -3.72729800 | -3.20630700 |
| H | 0.13601300  | 4.75438300 | -0.19838700 | H | 0.37878600  | -2.11402800 | -3.17454600 |
| C | 2.73945100  | 3.80768300 | -0.75466000 | C | -1.48052100 | -4.03990500 | -2.43399000 |
| H | 2.93187800  | 4.51937800 | -1.56524500 | H | -2.29357100 | -4.42318900 | -1.79956800 |
| H | 2.58126200  | 4.32313400 | 0.19949000  | H | -1.88693400 | -3.29874600 | -3.13822800 |
| H | 3.55369300  | 3.08176900 | -0.67727100 | H | -1.12479800 | -4.88291900 | -3.03926200 |

### Sub7-intramolecular

|    |             |             |             |
|----|-------------|-------------|-------------|
| C  | -3.32840200 | 1.20157100  | 1.79482200  |
| C  | -4.12176500 | 0.11404200  | 1.43571700  |
| C  | -3.65088100 | -0.83658400 | 0.53783800  |
| C  | -2.38154700 | -0.69529600 | -0.01480800 |
| C  | -1.58159500 | 0.42958900  | 0.27462500  |
| C  | -2.07666700 | 1.35003400  | 1.21699600  |
| H  | -3.69426500 | 1.93448000  | 2.51042700  |
| H  | -5.11109500 | -0.00810200 | 1.87246500  |
| H  | -4.25335700 | -1.71273000 | 0.29860700  |
| H  | -1.12771800 | 1.15358900  | -0.74164300 |
| H  | -1.46740600 | 2.22064200  | 1.46104500  |
| N  | -1.91215200 | -1.73295700 | -0.86086000 |
| H  | -2.59503300 | -2.19953600 | -1.44684800 |
| C  | -0.70226400 | -2.31980600 | -0.72702700 |
| O  | 0.14383700  | -1.90422100 | 0.08840000  |
| C  | -0.31960500 | -3.48764200 | -1.61448400 |
| Pd | 0.50991300  | 0.12108900  | 0.12068400  |
| C  | 0.24112200  | 2.68904300  | -0.96848100 |
| O  | 0.97242100  | 2.12296100  | -0.12204900 |
| O  | -0.80292400 | 2.23936500  | -1.50016700 |
| C  | 2.90448400  | -1.03825600 | 0.91701300  |
| O  | 2.46910100  | -0.40182300 | -0.11433200 |
| C  | 4.16574100  | -1.84941500 | 0.56127400  |
| C  | 0.62591300  | 4.11966700  | -1.38030500 |
| O  | 2.42212300  | -1.11346500 | 2.03026400  |
| F  | 0.67871100  | 4.20633000  | -2.70453000 |
| F  | -0.31408900 | 4.95563600  | -0.93832600 |
| F  | 1.79107800  | 4.48768800  | -0.87951000 |
| F  | 5.06587200  | -1.12757700 | -0.10311800 |
| F  | 3.80222200  | -2.87578800 | -0.23144300 |
| F  | 4.75057600  | -2.35686700 | 1.63714000  |
| C  | 0.27922700  | -4.58794200 | -0.73454400 |
| H  | 0.62794500  | -5.40904100 | -1.37422600 |
